1 **Instructive starPEG-Heparin biohybrid 3D cultures for modeling**  
2 **human neural stem cell plasticity, neurogenesis, and**  
3 **neurodegeneration**

4

5 Christos Papadimitriou<sup>1,2</sup>, Mehmet I. Cosacak<sup>1,2</sup>, Violeta Mashkaryan<sup>1,2</sup>,  
6 Hilal Celikkaya<sup>1,2</sup>, Laura Bray<sup>3,4</sup>, Prabesh Bhattarai<sup>1,2</sup>, Heike Hollak<sup>1,2</sup>, Xin  
7 Chen<sup>5</sup>, Shuijin He<sup>5</sup>, Christopher L. Antos<sup>5,6</sup>, Alvin K. Thomas<sup>7</sup>, Jens  
8 Friedrichs<sup>2,3</sup>, Andreas Dahl<sup>7</sup>, Yixin Zhang<sup>8</sup>, Uwe Freudenberg<sup>2,3</sup>, Carsten  
9 Werner<sup>2,3</sup>, Caghan Kizil<sup>1,2,\*</sup>

10

11 <sup>1</sup> German Center for Neurodegenerative Diseases (DZNE) Dresden,  
12 Helmholtz Association, Arnoldstr. 18, 01307, Dresden, Germany.

13 <sup>2</sup> Center for Regenerative Therapies (CRTD), Technische Universität  
14 Dresden, Fetscherstr. 105, 01307, Dresden, Germany.

15 <sup>3</sup> Leibniz Institute of Polymer Research Dresden, Max Bergmann Center of  
16 Biomaterials Dresden, Hohe Str. 6, 01069, Dresden, Germany.

17 <sup>4</sup> Institute of Health Biomedical Innovation (IHBI), Queensland University  
18 of Technology, 60 Musk Avenue, Kelvin Grove, 4059, Australia.

19 <sup>5</sup> School of Life Sciences and Technology, ShanghaiTech University,  
20 Shanghai 201210, People's Republic of China.

21 <sup>6</sup> Institut für Pharmakologie und Toxikologie, Technische Universität  
22 Dresden Medizinische Fakultät, Fetscherstr. 74, 01307, Dresden,  
23 Germany.

24 <sup>7</sup> Deep Sequencing Group, Biotechnology Center, TU Dresden, Fetscherstr.  
25 105, 01307, Dresden, Germany.

26 <sup>8</sup> B CUBE, Center for Molecular Bioengineering, TU Dresden, Arnoldstr. 18,  
27 10307, Dresden, Germany.

28

29 \*Correspondence should be addressed to: C.K. ([caghan.kizil@dzne.de](mailto:caghan.kizil@dzne.de)).  
30 Fetscherstr. 105, 01307, Dresden, Germany.

31

32 **Keywords:**

33 Human neural stem cell, plasticity, Amyloid-beta42, whole transcriptome  
34 sequencing, 3D culture, neurogenesis

35

36 **Abstract**

37 Three-dimensional models of human neural development and  
38 neurodegeneration are crucial when exploring stem-cell-based  
39 regenerative therapies in a tissue-mimetic manner. However, existing 3D  
40 culture systems are not sufficient to model the inherent plasticity of NSCs  
41 due to their ill-defined composition and lack of controllability of the  
42 physical properties. Adapting a glycosaminoglycan-based, cell-responsive  
43 hydrogel platform, we stimulated primary and induced human neural stem  
44 cells (NSCs) to manifest neurogenic plasticity and form extensive neuronal  
45 networks *in vitro*. The 3D cultures exhibited neurotransmitter  
46 responsiveness, electrophysiological activity, and tissue-specific  
47 extracellular matrix (ECM) deposition. By whole transcriptome  
48 sequencing, we identified that 3D cultures express mature neuronal  
49 markers, and reflect the *in vivo* make-up of mature cortical neurons  
50 compared to 2D cultures. Thus, our data suggest that our established 3D  
51 hydrogel culture supports the tissue-mimetic maturation of human  
52 neurons. We also exemplarily modeled neurodegenerative conditions by  
53 treating the cultures with A $\beta$ 42 peptide and observed the known human  
54 pathological effects of Alzheimer's disease including reduced NSC  
55 proliferation, impaired neuronal network formation, synaptic loss and  
56 failure in ECM deposition as well as elevated Tau hyperphosphorylation  
57 and formation of neurofibrillary tangles. We determined the changes in  
58 transcriptomes of primary and induced NSC-derived neurons after A $\beta$ 42,  
59 providing a useful resource for further studies. Thus, our hydrogel-based  
60 human cortical 3D cell culture is a powerful platform for studying various  
61 aspects of neural development and neurodegeneration, as exemplified for  
62 A $\beta$ 42 toxicity and neurogenic stem cell plasticity.

63

64

## 65 **Significance**

66 *Neural stem cells (NSC) are reservoir for new neurons in human brains,*  
67 *yet they fail to form neurons after neurodegeneration. Therefore,*  
68 *understanding the potential use of NSCs for stem cell-based regenerative*  
69 *therapies requires tissue-mimetic humanized experimental systems. We*  
70 *report the adaptation of a 3D bio-instructive hydrogel culture system*  
71 *where human NSCs form neurons that later form networks in a controlled*  
72 *microenvironment. We also modeled neurodegenerative toxicity by using*  
73 *Amyloid-beta4 peptide, a hallmark of Alzheimer's disease, observed*  
74 *phenotypes reminiscent of human brains, and determined the global gene*  
75 *expression changes during development and degeneration of neurons.*  
76 *Thus, our reductionist humanized culture model will be an important tool*  
77 *to address NSC plasticity, neurogenicity, and network formation in health*  
78 *and disease.*

79

## 80 **Text**

### 81 **Introduction**

82 Human brain development and neuronal diseases cannot be modeled  
83 adequately by current animal models (LaFerla and Green, 2012);  
84 therefore, the development of novel humanized systems that manifest  
85 neurogenic plasticity is necessary. The brain's plasticity provides an  
86 endogenous reservoir of cells that could be harnessed to physiologically  
87 enhance brain capacity or for neuronal repair (Gage and Temple, 2013;  
88 Wyss-Coray, 2016). Therefore, it is fundamentally important to  
89 understand how neurons develop to form a hard-wired network, how new  
90 networks are generated when newly formed neurons are incorporated,  
91 and how stem cells contribute to these processes. Animal models and cell  
92 culture experiments examining how mammalian brains develop and  
93 elucidating the molecular programs regulating this process have been  
94 invaluable (Molyneaux et al., 2007). However, the human brain might  
95 exhibit differences compared with the model systems that might not be  
96 discernable with existing tools.

97 The human brain cannot repair the loss of neurons caused by  
98 neurodegenerative diseases (ND), in part due to reduced stem cell  
99 proliferation and neurogenesis (Tincer et al., 2016). These combinatorial  
100 effects exacerbate the manifestation of the disease. In ND states in  
101 humans, overall plasticity is severely decreased (Heneka et al., 2015;  
102 Nalbantoglu et al., 1997; Selkoe, 2002), however, we know little about  
103 how to circumvent this reduction due to lack of appropriate experimental  
104 systems. Alzheimer's disease (AD) is the most common ND, and one of its  
105 hallmarks is the aggregation of amyloid protein cleavage products –  
106 mainly amyloid- $\beta$ -42 (A $\beta$ 42) peptides (Esler and Wolfe, 2001; Haass and  
107 Selkoe, 2007; Nalbantoglu et al., 1997). The disease state produces an  
108 inhospitable environment lacking homeostasis in which stem cells are  
109 unable to form neurons and new cells do not survive and successfully  
110 integrate into existing circuitry. Therefore, understanding stem cell  
111 plasticity and neuronal behavior in disease-related settings is critical to  
112 determine if a stem cell can regain proliferative and neurogenic function  
113 or whether a newborn neuron can survive and integrate into the  
114 remaining circuitry despite prevalent amyloid toxicity in the brain.

115 The overall plasticity of the human brain requires neural stem cell (NSC)  
116 proliferation, neurogenesis and neuronal network formation (Alvarez-  
117 Buylla et al., 2002; Gage, 2000). However, although NSCs in human brain  
118 possess the plasticity to fulfill all these steps, 2D culture conditions are  
119 insufficient to generate the connected arbors and long-term behaviors  
120 observed in the brain (Haycock, 2011; Justice et al., 2009). Culture  
121 conditions that drive the generation of neurons that retain a mature  
122 neuronal morphology and form synapses and 3D patterns are needed to  
123 address how the entire spectrum of plasticity manifests in the human  
124 brain. In addition, paracrine effects from the interplay between glia and  
125 neurons, the nascent cellular microenvironment, and the extracellular  
126 matrix (ECM) regulate cell fate decisions (Lutolf et al., 2009). In  
127 particular, the modulation of mechanical cues, the degradability of the  
128 matrix, and the administration of soluble effectors is known to control  
129 stem cell fate (Discher et al., 2009). Therefore, we require advanced  
130 customized and controllable assay systems for human neural stem cells.

131 Animal models of AD are unable to recapitulate the entire human disease  
132 spectrum (LaFerla and Green, 2012), suggesting that human cells might  
133 have a different physiological response than animal cells in response to  
134 NDs. Additionally, revolutionary 3D technologies are useful tools for  
135 addressing specific questions; however, they require highly complex  
136 culture conditions, are difficult to establish and reproduce, and the  
137 content of the scaffolds often have unintended consequences on the  
138 encapsulated cells. Therefore, *in vitro* systems utilizing human cells to  
139 model neural development or neurodegeneration in an *in vivo*-like 3D  
140 environment that is amenable to manipulation and monitoring would be  
141 highly beneficial. Therefore, in this study, we adapted a highly tunable  
142 and defined glycosaminoglycan (GAG)-based 3D matrix system (Chwalek  
143 et al., 2014; Maitz et al., 2013) to culture primary and induced human  
144 neural stem cells, which manifest their plasticity and neurogenic capacity.  
145 This system allowed us to systematically vary the local cellular  
146 environment in terms of stiffness, degradability and presentation of GAG-  
147 affine signaling molecules (Capilla and Linhardt, 2002) to identify optimal  
148 conditions that reproducibly form networks of mature neurons and glia  
149 that serve as neural stem cells. We also recapitulated important aspects  
150 of AD by modeling amyloid toxicity. A $\beta$ 42 treatment impaired network  
151 formation and progenitor cell proliferation and induced human  
152 pathological hallmarks, including Tau hyperphosphorylation and  
153 neurofibrillary tangle formation, suggesting that our biohybrid 3D culture  
154 system can be used to address questions regarding neural stem cell  
155 proliferation, neurodevelopment and neurodegenerative diseases in a  
156 reductionist and tissue mimetic pre-clinical setting.

## 157 **Results**

158 To generate a culture system that would allow NSCs to manifest their  
159 plasticity and neurogenic capacity in a tissue-representative manner, we  
160 applied a modular biohybrid material based on star-shaped poly(ethylene  
161 glycol) (starPEG) and GAG heparin (HEP) that can be used to  
162 independently tune mechanical cues and biomolecular functionalization  
163 (Freudenberg et al., 2012; Tsurkan et al., 2013) when embedding primary  
164 human neural stem cells (human cortical astrocytes, from here on primary

165 NSCs) derived from fetal tissue at gestation week 21 (Fig. 1A). We  
166 systematically varied the biohybrid matrix in terms of stiffness, cell-  
167 responsive remodeling potential, and the presence of soluble effector  
168 mediating GAGs to induce the cellular morphology reminiscent of *in vivo*  
169 (Supplementary Figure 1). After varying the stiffness (Young's modulus)  
170 of the hydrogels from 0.5 kPa to 3 kPa (Fig. 1B,B'), 1.2 kPa was the  
171 optimal stiffness to promote the formation of extended neuronal networks  
172 by primary NSCs (Fig. 1B'). Although soft gels (0.5 kPa) disintegrated  
173 within 1 week (data not shown), stiff gels (3 kPa) resulted in round non-  
174 proliferative cells that do not grow into the matrix or form a network (Fig.  
175 1B').

176 Tissue characteristics and patterning can be influenced by the cell-  
177 responsive remodeling of biohybrid hydrogels, which can be achieved by  
178 the incorporation of matrix-metalloprotease-cleavable linkers (Chwalek et  
179 al., 2011; Tsurkan et al., 2010). Using MMP-cleavable hydrogels (starPEG-  
180 MMP-HEP) (Fig. 1C,C'), directly linked starPEG-HEP gels (Fig. 1D,D') and  
181 non-degradable controls with a scrambled (MMP-insensitive) peptide  
182 sequence (starPEG-scr-HEP) (Fig. 1E,E'), we found that only MMP-  
183 responsive hydrogels induced the formation of a neuronal network (Fig.  
184 1C). Given that the optimal stiffness was 1200 Pa for all of these gels (Fig.  
185 1F), these results clearly point to enzymatic remodeling involving MMPs  
186 (Agrawal et al., 2008) as a crucial process for axodendritic outgrowth and  
187 the formation of mature arbors. Moreover, if an enzymatically degradable  
188 hydrogel of inert starPEG was formed, the cells did not proliferate and did  
189 not display axodendritic extensions, highlighting the importance of a  
190 factor regulating GAG-heparin interaction within the matrices (data not  
191 shown). Because heparin can bind multiple insoluble matrix proteins (e.g.,  
192 laminin, fibronectin) and other soluble growth factors (Capila and  
193 Linhardt, 2002; Garg et al., 2011), it might mediate the activity and  
194 presentation of cell-secreted molecules and thus indirectly control cell fate  
195 processes. Sulfated GAGs, particularly heparan sulfate and chondroitin  
196 sulfate, are well known to be a major component of neuronal ECMs and  
197 are crucial for developmental processes and axon guidance (Lau et al.,  
198 2013). Thus, the MMP-cleavable heparin hydrogel matrix provided optimal

199 conditions with respect to initial stiffness and the presence of sulfated  
200 GAGs and promoted remodeling in a well-orchestrated and timely way via  
201 MMP-sensitive peptide linkers.

202 Since the development of 3D cultures requires MMP-cleavage, we  
203 hypothesized that the observed maturation and patterning might follow a  
204 replacement of the initial scaffold with the cells' own matrix. Therefore,  
205 we immunostained the cultures for fibronectin and laminin to test this  
206 hypothesis and found that the 3D gels generate fibronectin (Fig. 1G,H)  
207 and laminin (Fig. 1I,J) *de novo*, suggesting that neural stem cells and  
208 neurons remodel the matrix allowing to generate a liberal stem cell niche  
209 according to the needs of the NSCs. To investigate whether this  
210 remodeling would alter the stiffness of the gel matrix, we performed  
211 atomic force microscopy analyses of the gels at different time points and  
212 observed that the initial elastic modulus of 1.3 kPa is reduced gradually to  
213 0.3 kPa after 14 days (Fig. 1K), indicating that the development of  
214 starPEG-Heparin 3D cultures generate human brain-mimetic physical  
215 properties. This is particularly important because widely used 3D scaffolds  
216 (e.g.: Matrigel) cannot be regulated in their stiffness by the encapsulated  
217 cells, and therefore they deviate from tissue-mimetic physical features.  
218 Indeed, when we compared the network forming ability of primary human  
219 NSCs in identical culture conditions in starPEG-Heparin and Matrigel, we  
220 found that the neurogenic capacity and network-formation ability of  
221 primary NSCs manifest significantly better in starPEG-Heparin gels  
222 (Supplementary Figure 2), indicating that starPEG-Heparin composition  
223 favors an unprecedented tissue-mimetic environment for primary NSCs.

224 Based on our cell-matrix interaction results, we hypothesized that the  
225 maturation of neuronal networks (Fig. 1L) might resemble human  
226 neurodevelopment. We analyzed the gels at various time points to  
227 address this hypothesis (Fig. 1M-P). One week after seeding, the gel  
228 contained sparsely distributed GFAP-positive glia with a 3D arborized  
229 morphology (Fig. 1M). After two weeks of culture, we started to observe  
230 acetylated tubulin-positive neurons extending processes and organizing  
231 themselves into clusters (Fig. 1N; Suppl. Video 1). At 3 weeks, the  
232 cultures produced an extensive and elaborate network of neurons with

233 interspersed glia (Fig. 1O) in close association with neurons (Fig. 1P). We  
234 also determined that the primary NSC cultures expressed neural stem cell  
235 markers such as SOX2 and GFAP, and neural fate determinants such as  
236 NEUROD in spatially overlapping, but distinct domains (Fig. 1Q, X-axis  
237 view; Fig. 1R, Z-axis view), indicating that neural stem cell plasticity  
238 programs and neurogenic activity drive the development of the neuronal  
239 networks, and the stem cell compartments may pattern in a 3D topology  
240 similar to human brains.

241 Based on our findings, we hypothesized that 3D cultures would provide a  
242 superior 3D topological environment to pNSCs, and therefore would  
243 instruct a gene expression profile that would be closer to *in vivo*. To  
244 investigate how 3D cultures would molecularly differ from 2D cultures, we  
245 cultured primary NSCs in 2D and 3D using identical culture conditions for  
246 three weeks. After isolating total mRNA, we performed whole  
247 transcriptome sequencing, and observed that a considerable number of  
248 genes are differentially expressed between 2D and 3D cultures (Fig. 2A,  
249 Supplementary Dataset 1). In order to identify the pathways and  
250 molecular programs represented better in 3D cultures, we performed  
251 pathway and enrichment analyses (Fig. 2B). We found that 3D cultures  
252 express genes related to several pathways that characterize mature  
253 neuronal physiology such as focal adhesion, ECM-receptor interaction,  
254 axon guidance, and various signaling pathways (Fig. 2B, Suppl. Dataset  
255 2). Additionally, cellular component analyses indicate that the 3D cultures  
256 express the genes, the protein products of which are related to various  
257 mature neuronal processes such as synapses and axons (Fig. 2B). These  
258 results indicate that our hydrogel cultures provide the 3D topology and  
259 instructive environment to generate neuronal networks from primary  
260 human NSCs in a tissue-mimetic manner, which is not the case for 2D  
261 cultures.

262 To verify that the 3D cultures of primary human NSCs generate mature  
263 neurons resembling the *in vivo* conditions, we immunostained 3D cultures  
264 for the synaptic marker Synaptophysin (Fig. 2C), which clusters at  
265 neuronal junctions (Fig. 2D) and boutons (Fig. 2E), and generate pre- and  
266 post-synaptic termini (Fig. 2F), indicating that neurons in 3D cultures



267 develop enough to form synaptic connections, which we did not observe in  
268 2D conditions (data not shown). We found that the neurons formed in the  
269 3D starPEG-HEP-based hydrogels were also expressing neurotransmitter  
270 receptors such as VGLUT1 (Fig. 2G), and are responsive to  
271 neurotransmitters such as glutamate, as shown by increased intracellular  
272 calcium levels (Fig. 2H-J; Suppl. Video 2) following the transfection of  
273 plasmids expressing the GCamp6f calcium sensor driven by the CMV  
274 promoter. We also performed electrophysiology experiments assessing  
275 sodium and potassium channel activity to determine whether the cells  
276 from the matrices were functional neurons. We observed potassium and  
277 sodium channel activity as well as spontaneous firing of neurons in whole  
278 cell patch clamp recordings (Fig. 2K), indicating that cells cultured within  
279 the hydrogels differentiated into functionally active neurons. These results  
280 indicate that starPEG-HEP-hydrogel-based 3D cultures of primary human  
281 NSCs are able to generate an elaborate and mature network of neurons  
282 and glia in a three dimensional organization.

283 To determine the cortical subtypes produced in 3D and 2D conditions, we  
284 compared the expression levels of a selected set of cortical marker genes  
285 in relation to their spatial confinement to different layers (Fig. 2L; from  
286 (Molyneaux et al., 2007)). We observed that 3D conditions favor for  
287 expression of a larger and more complete set of cortical marker genes  
288 especially associated with layers IV, V and VI, compared to 2D (Fig. 2L).  
289 Similarly, although 2D and 3D conditions allow expression of NSC markers  
290 at high levels, the major cortical pro-neural gene ASCL1 is expressed in  
291 rather low levels in 2D conditions while 3D cultures allow significantly  
292 higher levels of ASCL1 expression (Fig. 2M). To validate our deep  
293 sequencing results and heat map analyses, we performed  
294 immunohistochemistry for pro-neural determinant ASCL1 and early  
295 neuronal marker DCX, cortical layer markers SATB2, CTIP2, Reelin  
296 (RELN), DBX1, FOXO1, FOXP2, CRYM, and mature neuronal markers  
297 Neurofilament-200 and NeuN (Fig. 2N). We found that 3D cultures allow  
298 expression of pro-neural fate determinants, and production of different  
299 lineage subtypes of cortical neurons (Fig. 2N).

300 To test whether we could use our system with other types of neural stem  
301 cells, we cultured iPSC-derived human neural stem cells (iNSCs) in culture  
302 under conditions identical to those of primary NSCs (pNSCs), and  
303 observed extensive neurogenesis and network formation similar to pNSCs  
304 at 3 weeks of cultures (Fig. 3A,B, Suppl. Movie 3), suggesting that our  
305 instructive hydrogel composition can support development of networks  
306 from various types of neural stem cell sources.

307 To compare the molecular expression profiles of pNSC and iNSC cultures,  
308 we isolated total RNA and performed whole transcriptome sequencing on  
309 iNSCs and compared the reads to those of the cultures with pNSCs (Fig.  
310 3C, Suppl. Dataset 3). We found that although both iNSCs and pNSCs can  
311 generate neuronal networks in 3D cultures, these two cell types differ  
312 significantly in their gene expression patterns (Fig. 3C; Suppl. Dataset 4).  
313 Interestingly, we found that compared to iNSCs, pNSC cultures express  
314 genes related to extracellular matrix and plasma membrane more (Fig.  
315 3D; Suppl. Dataset 5), and these differences enrich pathways such as  
316 various signaling pathways, axon guidance, neuroactive ligand-receptor  
317 interaction and metabolism (Fig. 3D; Suppl. Dataset 6). Furthermore,  
318 when we compared cortical layer marker expression in iNSCs and pNSCs,  
319 we found that compared to pNSCs, iNSC cultures cannot form a subset of  
320 neuronal lineages especially for layers II, III and IV in our particular  
321 culture conditions (Fig. 3E). These findings suggest that our 3D culture  
322 system can be used to dissect the properties and neurogenic capacities of  
323 different progenitor types in particular culture settings and under certain  
324 physical parameters, and may serve as a suitable tool for investigating  
325 the physiological differences between induced and primary NSC  
326 populations.

327 Since our culture system can form cortical neurons, the development of  
328 which relies on the plasticity and neurogenic ability of human NSCs, we  
329 hypothesized that we could model disease conditions that lead to impaired  
330 NSC plasticity and neurogenic output. In the human brain, A $\beta$ 42  
331 aggregation impairs neuronal network formation and neuronal  
332 connectivity due to death of existing neurons as well as loss of neurogenic  
333 ability and neural stem cell plasticity (Hardy and Selkoe, 2002; Kienlen-

334 Campard et al., 2002; LaFerla et al., 2007; Selkoe, 2002; Tincer et al.,  
335 2016). A $\beta$ 42 was shown to negatively affect the plasticity and  
336 neurogenesis of NSCs in mouse models of AD (Ermini et al., 2008;  
337 Haughey et al., 2002; Heo et al., 2007), and the same effect is one of the  
338 principle limitations of current neuro-regenerative approaches to the  
339 treatment of AD in humans (Cosacak et al., 2015; Demars et al., 2010;  
340 Tincer et al., 2016). However, the mechanisms underlying the impact of  
341 A $\beta$ 42 on NSC plasticity are still largely unknown and cannot be elucidated  
342 analytically in human brains. We therefore extended our above-described  
343 3D cultures by treating primary NSCs with A $\beta$ 42, a major hallmark of AD  
344 pathology, before embedding them in the biohybrid hydrogels (Figure 4A).  
345 We used an A $\beta$ 42 form that we previously found to be causing  
346 pathological outcomes in vertebrate brains (Bhattarai et al., 2016;  
347 Bhattarai et al., 2017b). In control gels, the neurons formed highly  
348 connected networks (Fig. 4B) that were disrupted upon A $\beta$ 42 treatment  
349 (Fig. 4C). We developed an algorithm to trace the connected neuronal  
350 paths as skeletonized arbors and quantified the extent of the neuronal  
351 connections, and observed that neuronal networks reduce significantly  
352 after Amyloid toxicity (Fig. 4D-F). Similar to human brains, A $\beta$ 42 resulted  
353 in dystrophic axons (Fig. 4G-G''; Supplementary Video 5), impaired ECM  
354 composition and stiffness (Figure 4H-J), Tau hyperphosphorylation (Figure  
355 4K-N, Supplementary Movie 5), neurofibrillary tangle formation as  
356 observed by Gallyas silver impregnation (Fig. 4m, Suppl. Fig. 3) and  
357 Thioflavin S staining (Fig. 4N), microtubule disassembly (Figure 4O), and  
358 amyloid aggregation and autophagy (Figure 4P,Q).

359 Amyloid toxicity not only impairs neurogenesis and neuronal survival but  
360 also reduces synaptic plasticity (Selkoe, 2002). Amyloid load prevents the  
361 formation of new synapses, and newly added cells cannot integrate into  
362 the circuitry, rendering exogenous stem cell therapy inefficient (Lilja et  
363 al., 2015; Tong et al., 2015). We developed a transplantation paradigm  
364 with cultured gels to test whether our 3D culture model could be used to  
365 address questions regarding the neurogenic potential and capacity of  
366 transplanted cells to integrate into existing networks (Fig. 4R). We labeled  
367 all pNSCs with a nuclear stain, and injected them into another hydrogel

368 that had been pre-cultured with embedded pNSCs for 1 week (Fig. 4R). At  
369 1 week after transplantation, the injected cells formed neurons with  
370 arbors (red nuclei, Fig. 4R; Supplementary Video 7) and connected to pre-  
371 existing cells in the control gels (Fig. 4R,R'). In contrast, cells injected into  
372 A $\beta$ 42-containing gels did not acquire an arborized morphology or connect  
373 to the existing cells that were also not arborized (Fig. 4S,S';  
374 Supplementary Video 8). Combined with the findings that A $\beta$ 42 impairs  
375 the synaptic connections overall (Fig. 4T), these results suggest that 3D  
376 cultures can be used for analyzing how synaptic connections can be  
377 regenerated and how new neurons can be forced to integrate into the  
378 existing circuitry upon A $\beta$ 42 toxicity.

379 A $\beta$ 42 reduces the NSC plasticity and neurogenic capacity in human brains,  
380 and stem cell-based regenerative therapies would require therapeutic  
381 activation of NSCs (Tincer et al., 2016). To investigate whether A $\beta$ 42  
382 reduced NSC plasticity in our 3D cultures, we determined the proliferative  
383 capacity and prevalence of pNSCs after A $\beta$ 42 by BrdU/EdU treatment and  
384 immunohistochemical stainings for NSC markers SOX2 and GFAP (Fig. 4U-  
385 X). We treated the cultures with BrdU at 1 week of development and with  
386 EdU at 2 weeks of development, and analyzed the presence of BrdU and  
387 EdU positive cells at 3 weeks of cultures where double-positive cells would  
388 indicate constitutively proliferating stem cells (Fig. 4U,V). We found that  
389 A $\beta$ 42 reduced BrdU-EdU incorporation and the number of constitutively  
390 proliferating cells (Fig. 4Y) as well as reducing numbers of GFAP and  
391 SOX2-positive NSCs (Fig. 4Y), indicating that our 3D culture system can  
392 be used for modeling A $\beta$ 42-induced impairment of NSC plasticity. Thus,  
393 our 3D cultures of NSCs can also successfully serve as a novel *in vitro*  
394 sporadic AD model of A $\beta$ 42 toxicity on human NSC plasticity and  
395 neurogenesis (Figure 4Z). Importantly, we found that all those effects of  
396 A $\beta$ 42 observed in 3D cultures are specific because scrambled A $\beta$ 42 or  
397 other A $\beta$  species such as A $\beta$ 38 do not show any phenotypes above (Suppl.  
398 Figure 4).

399 To determine if A $\beta$ 42 would affect the neuronal network formation and  
400 NSC plasticity in iPSC-derived cultures, we treated the iNSCs with A $\beta$ 42,  
401 encapsulated in 3D gels. To determine the neuronal network formation,

402 NSC prevalence, and proliferative capacity, we performed  
403 immunostainings for GFAP and TUBB3 (Fig. 5A,B), SOX2 and GFAP (Fig.  
404 5C,D), and GFAP and BrdU (Fig. 5E,F) together with A $\beta$ 42 detection.  
405 Compared to controls, A $\beta$ 42 reduces the total number of newborn cells  
406 and NSCs (GFAP/SOX2-positive) (Fig. 5G), average number of networks  
407 (Fig. 5H), average number of branches per network (Fig. 5I), average  
408 branch length per network (Fig. 5J), length of longest connected path  
409 (Fig. 5K), and maximum branch length (Fig. 5L) in cultures started with  
410 iNSCs. These results show that A $\beta$ 42 impairs the plasticity, neurogenic  
411 ability and network forming capacity of primary and human NSC cultures  
412 in our 3D hydrogel matrix, and our system can also be used for iPSC-  
413 derived cell types.

414 To determine the gene expression changes exerted by A $\beta$ 42 in 3D  
415 cultures, we performed whole transcriptome sequencing on control and  
416 A $\beta$ 42-treated cultures initiated with human iNSCs (Fig. 5M, Suppl. Dataset  
417 7) and pNSCs (Fig. 5N, Suppl. Dataset 8). Cellular component analyses  
418 and KEGG pathway enrichment analyses in iNSC-derived (Fig. 5O, Suppl.  
419 Dataset 9, 10) and primary (Fig. 5P, Suppl. Dataset 11, 12) cultures  
420 showed that divergent pathways are affected by A $\beta$ 42 in 3D cultures.  
421 Hierarchical clustering (Fig. 5Q) and multivariate analyses (Fig. 5R)  
422 indicated that primary and induced NSC cultures have their own molecular  
423 signatures of gene expression, which are affected by A $\beta$ 42. By plotting a  
424 heat map of gene expression changes, we also found that several cortical  
425 marker genes are differentially expressed after A $\beta$ 42 in induced and  
426 primary human NSC-based 3D cultures (Fig. 5S), which is suggestive of  
427 the alterations in the cortical neuronal subtypes (for instance, POU3F2,  
428 CRYM, and FOXO1). Our results indicate that although A $\beta$ 42 causes  
429 impaired neural stem cell plasticity, neurogenesis and network formation  
430 in both iNSC- and pNSC-derived cultures (Fig. 4, Fig. 5), the molecular  
431 programs it alters in these cultures do differ (Fig. 5O, P, S). This finding is  
432 consistent with previous documentations that primary and iPSC-derived  
433 neural stem cells have profound physiological differences that might affect  
434 subsequent global gene expression, neuronal maturation capacity, and  
435 resilience to disease conditions (Kim et al., 2011; Kim et al., 2010;

436 Verpelli et al., 2013; Xia et al., 2016). Therefore, our results suggest that  
437 starPEG-Heparin 3D culture system can also be used to dissect the effects  
438 of A $\beta$ 42 on different stem cell and neuronal populations. Furthermore, our  
439 3D cultures may help refining the overall toxicity of A $\beta$ 42 to distinct  
440 physiological states and cellular characteristics of experimental cellular  
441 systems. Since our cultures do not contain inflammatory cells, this system  
442 will also help to investigate the direct roles of A $\beta$ 42 on stem cells and  
443 neurons in a reductionist and dissective manner.

#### 444 **Discussion**

445 Neurodegenerative diseases such as AD present with a perplexing set of  
446 impairments, including neuronal death, synaptic degeneration, and the  
447 inability of stem cells to produce neurons to replace lost neurons (Kienlen-  
448 Campard et al., 2002; LaFerla et al., 2007; Lindvall and Kokaia, 2006;  
449 Selkoe, 2002, 2003). Thus, designing effective regenerative therapies for  
450 patients with AD requires assay systems that address the parameters of  
451 neurodegenerative pathology individually and in combination in a  
452 reductionist way using human cells. Rodent models of neurodegeneration  
453 cannot recapitulate various aspects of human pathology (Gotz and Ittner,  
454 2008; LaFerla and Green, 2012). Thus, we used primary and iPSC-derived  
455 human neural stem cells (iNSCs) in 3D cultures to better reflect  
456 neurodevelopmental paradigms and neurodegenerative processes in a  
457 reductionist manner. 3D cultures using a well-defined biohybrid hydrogel  
458 system based on star-shaped PEG and heparin allowed the generation of  
459 extensive neuronal networks that could be used to address neurogenesis  
460 and connectivity-based questions.

461 Existing 3D culture systems, including Matrigel<sup>TM</sup>-based cultures, are  
462 chemically undefined and heterogeneous in composition and cannot be  
463 modified for various parameters, such as stiffness, scaffold composition or  
464 bioresponsiveness (Ravi et al., 2015). Thus, the interpretation of often  
465 quite variable results is difficult, and it is rarely possible to dissect the  
466 influences of different exogenous and paracrine signals on cellular  
467 development in an isolated and controllable experimental setup. Our  
468 biohybrid hydrogel system based on heparin and star-shaped PEG  
469 provides valuable advantages by enabling the independent and ongoing

470 adjustment of biophysical and biomolecular matrix signals. Indeed, we  
471 determined that starPEG-Heparin gels allow faster and more elaborate  
472 network formation compared to Matrigel upon identical culture conditions  
473 (Suppl. Fig 2). Moreover, the method we use to generate the gels does  
474 not cause cell death or DNA mutation that occurs in other matrices  
475 through the formation of free radicals upon polymer network formation.

476 Various 3D systems, including organoids, cannot form reproducibly sized  
477 or formed structures (Fatehullah et al., 2016). However, MMP-sensitive,  
478 starPEG-heparin-based 3D cultures can be customized for all of these  
479 parameters, providing better-defined conditions. Compared to previous  
480 reports modeling AD in 3D cultures using Matrigel (Choi et al., 2014;  
481 Smith et al., 2015), despite differences in the initial cell source, starPEG-  
482 heparin 3D gels enabled significantly faster development of neuronal  
483 networks that offer various advantages such as high-throughput screening  
484 approaches that are suitable for drug discovery.

485 The composition and architecture of the ECM is an integral parameter  
486 governing stem cell activity and tissue modeling. However, due to the  
487 complex interplay between multiple ECM-derived signals and their  
488 pleiotropic effects, *in vivo* assays pose a challenge to identifying the roles  
489 of exogenous cues in tissue patterning. Previously described methods for  
490 the formation of three-dimensional neuronal networks (Choi et al., 2014;  
491 Fatehullah et al., 2016; Tang-Schomer et al., 2014; Zhang et al., 2014)  
492 lack a defined composition and the ability to tune the artificial  
493 extracellular matrix. Our novel 3D matrix platform would be advantageous  
494 to dissect the roles of matrix properties in stem cell activity and  
495 differentiation, because cells can dynamically interact with the scaffold to  
496 generate their "own" cell-secreted ECM. Additionally, our hydrogels can be  
497 covalently functionalized with different matrix-derived peptides or could  
498 be used for the effective administration of GAG-affine soluble signal  
499 molecules. By doing so, the effects of exogenous cues could be  
500 individually tested on human neural stem/progenitor cell proliferation and  
501 neuronal network formation. Similarly, cells in 3D cultures can be  
502 transfected with plasmids for misexpression studies, a powerful tool for  
503 rapid investigation of gene function.

504 Our new 3D culture platform provides a novel and improved model to  
505 study the plasticity of human neural stem cells and disease states in real  
506 time. The application of customized A $\beta$ 42 peptides for optimized cellular  
507 uptake within the hydrogel-based 3D cultures indicates that our advanced  
508 culture method can recapitulate the major pathophysiology of human  
509 A $\beta$ 42 toxicity. Additionally, our gels can be used to experimentally  
510 investigate how new cells are incorporated into diseased brains, and how  
511 different sources of neural stem cells would molecularly affect the  
512 outcomes of A $\beta$ 42 toxicity (e.g.: primary versus induced neural stem  
513 cells). Individual differences between cell types and their response to  
514 disease stimuli can also be measured in a tissue-mimetic composition  
515 using our gel system. In overall, starPEG-heparin-hydrogel-based 3D  
516 human neural stem cell culture is a novel and comprehensive method for  
517 analyzing various stages of neural development and disease of the human  
518 cortex, from stem cell proliferation to neurogenesis and from neuronal  
519 maturation to integration into the circuitry, in a highly defined and  
520 controllable method in an *in vitro* environment. Our system can be  
521 expanded for examining embryonic stem cells, organoids or adult-derived  
522 cortical cells from humans, and analyze their stem cell properties or  
523 neurogenic capacity in a comparative manner to complement previous  
524 studies (Choi et al., 2014; Koutsopoulos and Zhang, 2013; Zhang et al.,  
525 2014). Beyond that, our established 3D hydrogel cultures can be expected  
526 to enable personalized medicine approaches targeting brain diseases or  
527 drug efficacy tests.

528

529 **Author contributions:** C.P. and C.K. conceived and designed the  
530 experiments. M.I.C. analyzed the next generation sequencing data and  
531 performed the bioinformatics analyses. L.B., U.F., and C.W. provided the  
532 gel materials, J.F. performed AFM studies. C.P. and H.C. performed cell  
533 cultures, imaging and quantifications. P.B., H.H. and V.M helped the cell  
534 cultures. C.P. optimized the culture conditions for iPSCs and Matrigel.  
535 A.K.T. and Y.Z. provided the Amyloid peptides. X.C., S.H. and C.L.A.  
536 performed whole-cell patch clamping. C.K. wrote the manuscript, C.K.,  
537 C.P., U.F., and C.W. revised the manuscript.



## 538 **Acknowledgements**

539 This work was supported by DZNE and Helmholtz Association (VH-NG-  
540 1021, C.K.), DFG (KI1524/6, C.K.), (AN797/4-1, C.L.A.) and (CRC TR 67,  
541 CRC SFB 655, FOR/EXC999, C.W.); and BMBF (PRECIMATRIX-FKZ-  
542 03XP0083-310117, C.W.). We wish to thank M. Wagner for  
543 electrophysiology, R. Szech for image rendering, and T. Kurth for electron  
544 microscopy.

## 545 **References**

- 546 Agrawal, S.M., Lau, L., and Yong, V.W. (2008). MMPs in the central nervous  
547 system: where the good guys go bad. *Semin Cell Dev Biol* 19, 42-51.
- 548 Alexa, A., Rahnenfuhrer, J., and Lengauer, T. (2006). Improved scoring of functional  
549 groups from gene expression data by decorrelating GO graph structure.  
550 *Bioinformatics* 22, 1600-1607.
- 551 Alvarez-Buylla, A., Seri, B., and Doetsch, F. (2002). Identification of neural stem  
552 cells in the adult vertebrate brain. *Brain Res Bull* 57, 751-758.
- 553 Bhattarai, P., Thomas, A.K., Cosacak, M.I., Papadimitriou, C., Mashkaryan, V.,  
554 Zhang, Y., and Kizil, C. (2017a). Modeling Amyloid- $\beta$ 42 Toxicity and  
555 Neurodegeneration in Adult Zebrafish Brain. *Journal of Visualized Experiments* 128.
- 556 Bhattarai, P., Thomas, A.K., Papadimitriou, C., Cosacak, M.I., Mashkaryan, V., Froc,  
557 C., Kurth, T., Dahl, A., Zhang, Y., and Kizil, C. (2016). IL4/STAT6 signaling  
558 activates neural stem cell proliferation and neurogenesis upon Amyloid- $\beta$ 42  
559 aggregation in adult zebrafish brain. *Cell Reports* 17, 941-948.
- 560 Bhattarai, P., Thomas, A.K., Zhang, Y., and Kizil, C. (2017b). The effects of aging on  
561 Amyloid- $\beta$ 42-induced neurodegeneration and regeneration in adult zebrafish brain.  
562 *Neurogenesis*.
- 563 Bray, L.J., Binner, M., Holzheu, A., Friedrichs, J., Freudenberg, U., Hutmacher,  
564 D.W., and Werner, C. (2015). Multi-parametric hydrogels support 3D in vitro  
565 bioengineered microenvironment models of tumour angiogenesis. *Biomaterials* 53,  
566 609-620.
- 567 Capila, I., and Linhardt, R.J. (2002). Heparin-protein interactions. *Angew Chem Int*  
568 *Ed Engl* 41, 391-412.
- 569 Capilla, I., and Linhardt, R.J. (2002). Heparin-protein interactions,. *Angew Chem Int*  
570 *Ed Engl* 41, 391-412.
- 571 Chen, T.W., Wardill, T.J., Sun, Y., Pulver, S.R., Renninger, S.L., Baohan, A.,  
572 Schreiter, E.R., Kerr, R.A., Orger, M.B., Jayaraman, V., *et al.* (2013). Ultrasensitive  
573 fluorescent proteins for imaging neuronal activity. *Nature* 499, 295-300.
- 574 Choi, S.H., Kim, Y.H., Hebisch, M., Sliwinski, C., Lee, S., D'Avanzo, C., Chen, H.,  
575 Hooli, B., Asselin, C., Muffat, J., *et al.* (2014). A three-dimensional human neural cell  
576 culture model of Alzheimer's disease. *Nature* 515, 274-278.
- 577 Chwalek, K., Bray, L.J., and Werner, C. (2014). Tissue-engineered 3D tumor  
578 angiogenesis models: Potential technologies for anti-cancer drug discovery. *Adv Drug*  
579 *Deliv Rev*.
- 580 Chwalek, K., Levental, K.R., Tsurkan, M.V., Zieris, A., Freudenberg, U., and Werner,  
581 C. (2011). Two-tier hydrogel degradation to boost endothelial cell morphogenesis.  
582 *Biomaterials* 32, 9649-9657.

- 583 Cosacak, M.I., Papadimitriou, C., and Kizil, C. (2015). Regeneration, Plasticity, and  
584 Induced Molecular Programs in Adult Zebrafish Brain. *Biomed Res Int* 2015:769763.
- 585 Demars, M., Hu, Y.S., Gadadhar, A., and Lazarov, O. (2010). Impaired neurogenesis  
586 is an early event in the etiology of familial Alzheimer's disease in transgenic mice. *J*  
587 *Neurosci Res* 88, 2103-2117.
- 588 Discher, D.E., Mooney, D.J., and Zandstra, P.W. (2009). Growth factors, matrices,  
589 and forces combine and control stem cells. *Science* 324, 1673-1677.
- 590 Ermini, F.V., Grathwohl, S., Radde, R., Yamaguchi, M., Staufenbiel, M., Palmer,  
591 T.D., and Jucker, M. (2008). Neurogenesis and alterations of neural stem cells in  
592 mouse models of cerebral amyloidosis. *Am J Pathol* 172, 1520-1528.
- 593 Esler, W.P., and Wolfe, M.S. (2001). A portrait of Alzheimer secretases--new features  
594 and familiar faces. *Science* 293, 1449-1454.
- 595 Fabig, G., Kretschmar, S., Weiche, S., Eberle, D., Ader, M., and Kurth, T. (2012).  
596 Labeling of ultrathin resin sections for correlative light and electron microscopy.  
597 *Methods Cell Biol* 111, 75-93.
- 598 Falcon, S., and Gentleman, R. (2007). Using GOstats to test gene lists for GO term  
599 association. *Bioinformatics* 23, 257-258.
- 600 Fatehullah, A., Tan, S.H., and Barker, N. (2016). Organoids as an in vitro model of  
601 human development and disease. *Nat Cell Biol* 18, 246-254.
- 602 Freudenberg, U., Sommer, J.U., Levental, K.R., Welzel, P.B., Zieris, A., Chwalek, K.,  
603 Schneider, K., Prokoph, S., Prewitz, M., Dockhorn, R., *et al.* (2012). Using Mean  
604 Field Theory to Guide Biofunctional Materials Design. *Adv Funct Mater* 22, 1391-  
605 1398.
- 606 Gage, F.H. (2000). Mammalian neural stem cells. *Science* 287, 1433-1438.
- 607 Gage, F.H., and Temple, S. (2013). Neural stem cells: generating and regenerating the  
608 brain. *Neuron* 80, 588-601.
- 609 Garg, H.G., Linhardt, R.J., and Hales, C.A. (2011). Chemistry and Biology of  
610 Heparin and Heparan Sulfate (Elsevier).
- 611 Gotz, J., and Ittner, L.M. (2008). Animal models of Alzheimer's disease and  
612 frontotemporal dementia. *Nat Rev Neurosci* 9, 532-544.
- 613 Haass, C., and Selkoe, D.J. (2007). Soluble protein oligomers in neurodegeneration:  
614 lessons from the Alzheimer's amyloid beta-peptide. *Nat Rev Mol Cell Biol* 8, 101-  
615 112.
- 616 Hardy, J., and Selkoe, D.J. (2002). The amyloid hypothesis of Alzheimer's disease:  
617 progress and problems on the road to therapeutics. *Science* 297, 353-356.
- 618 Haughey, N.J., Liu, D., Nath, a., Borchard, a.C., and Mattson, M.P. (2002).  
619 Disruption of neurogenesis in the subventricular zone of adult mice, and in human  
620 cortical neuronal precursor cells in culture, by amyloid beta-peptide: implications for  
621 the pathogenesis of Alzheimer's disease. *Neuromolecular Med* 1, 125-135.
- 622 Haycock, J.W. (2011). 3D cell culture: a review of current approaches and techniques.  
623 *Methods Mol Biol* 695, 1-15.
- 624 Heneka, M.T., Carson, M.J., El Khoury, J., Landreth, G.E., Brosseron, F., Feinstein,  
625 D.L., Jacobs, A.H., Wyss-Coray, T., Vitorica, J., Ransohoff, R.M., *et al.* (2015).  
626 Neuroinflammation in Alzheimer's disease. *The Lancet Neurology* 14, 388-405.
- 627 Heo, C., Chang, K.-A., Choi, H.S., Kim, H.-S., Kim, S., Liew, H., Kim, J.a., Yu, E.,  
628 Ma, J., and Suh, Y.-H. (2007). Effects of the monomeric, oligomeric, and fibrillar  
629 A $\beta$ 42 peptides on the proliferation and differentiation of adult neural stem cells from  
630 subventricular zone. *Journal of Neurochemistry* 102, 493-500.
- 631 Justice, B.A., Badr, N.A., and Felder, R.A. (2009). 3D cell culture opens new  
632 dimensions in cell-based assays. *Drug Discov Today* 14, 102-107.

- 633 Kienlen-Campard, P., Miolet, S., Tasiaux, B., and Octave, J.N. (2002). Intracellular  
634 amyloid-beta 1-42, but not extracellular soluble amyloid-beta peptides, induces  
635 neuronal apoptosis. *J Biol Chem* 277, 15666-15670.
- 636 Kim, J., Efe, J.A., Zhu, S., Talantova, M., Yuan, X., Wang, S., Lipton, S.A., Zhang,  
637 K., and Ding, S. (2011). Direct reprogramming of mouse fibroblasts to neural  
638 progenitors. *Proc Natl Acad Sci U S A* 108, 7838-7843.
- 639 Kim, K., Doi, A., Wen, B., Ng, K., Zhao, R., Cahan, P., Kim, J., Aryee, M.J., Ji, H.,  
640 Ehrlich, L.I., *et al.* (2010). Epigenetic memory in induced pluripotent stem cells.  
641 *Nature* 467, 285-290.
- 642 Kizil, C., Iltzsche, A., Kuriakose, A., Bhattarai, P., Zhang, Y., and Brand, M. (2015).  
643 Efficient cargo delivery using a short cell-penetrating peptide in vertebrate brains.  
644 *PLoS One* 10, e0124073.
- 645 Koutsopoulos, S., and Zhang, S. (2013). Long-term three-dimensional neural tissue  
646 cultures in functionalized self-assembling peptide hydrogels, matrigel and collagen I.  
647 *Acta Biomater* 9, 5162-5169.
- 648 LaFerla, F.M., and Green, K.N. (2012). Animal models of Alzheimer disease. *Cold*  
649 *Spring Harbor perspectives in medicine* 2.
- 650 LaFerla, F.M., Green, K.N., and Oddo, S. (2007). Intracellular amyloid-beta in  
651 Alzheimer's disease. *Nat Rev Neurosci* 8, 499-509.
- 652 Lau, L.W., Cua, R., Keough, M.B., Haylock-Jacobs, S., and Yong, V.W. (2013).  
653 Pathophysiology of the brain extracellular matrix: a new target for remyelination. *Nat*  
654 *Rev Neurosci* 14, 722-729.
- 655 Liao, Y., Smyth, G.K., and Shi, W. (2013). The Subread aligner: fast, accurate and  
656 scalable read mapping by seed-and-vote. *Nucleic Acids Res* 41, e108.
- 657 Liao, Y., Smyth, G.K., and Shi, W. (2014). featureCounts: an efficient general  
658 purpose program for assigning sequence reads to genomic features. *Bioinformatics*  
659 30, 923-930.
- 660 Lilja, A.M., Malmsten, L., Röjdner, J., Voytenko, L., Verkhatsky, A., Ögren, S.O.,  
661 Nordberg, A., and Marutle, A. (2015). Neural Stem Cell Transplant-Induced Effect on  
662 Neurogenesis and Cognition in Alzheimer Tg2576 Mice Is Inhibited by Concomitant  
663 Treatment with Amyloid-Lowering or Cholinergic  $\alpha 7$  Nicotinic Receptor Drugs.  
664 *Neural Plast* 2015, 370432.
- 665 Lindvall, O., and Kokaia, Z. (2006). Stem cells for the treatment of neurological  
666 disorders. *Nature* 441, 1094-1096.
- 667 Love, M.I., Huber, W., and Anders, S. (2014). Moderated estimation of fold change  
668 and dispersion for RNA-seq data with DESeq2. *Genome biology* 15, 550.
- 669 Luo, W., and Brouwer, C. (2013). Pathview: an R/Bioconductor package for pathway-  
670 based data integration and visualization. *Bioinformatics* 29, 1830-1831.
- 671 Lutolf, M.P., Gilbert, P.M., and Blau, H.M. (2009). Designing materials to direct  
672 stem-cell fate. *Nature* 462, 433-441.
- 673 Maitz, M.F., Freudenberg, U., Tsurkan, M.V., Fischer, M., Beyrich, T., and Werner,  
674 C. (2013). Bio-responsive polymer hydrogels homeostatically regulate blood  
675 coagulation. *Nat Commun* 4, 2168.
- 676 Molyneaux, B.J., Arlotta, P., Menezes, J.R., and Macklis, J.D. (2007). Neuronal  
677 subtype specification in the cerebral cortex. *Nat Rev Neurosci* 8, 427-437.
- 678 Nalbantoglu, J., Tirado-Santiago, G., Lahsaini, A., Poirier, J., Goncalves, O., Verge,  
679 G., Momoli, F., Welner, S.A., Massicotte, G., Julien, J.P., *et al.* (1997). Impaired  
680 learning and LTP in mice expressing the carboxy terminus of the Alzheimer amyloid  
681 precursor protein. *Nature* 387, 500-505.

- 682 Ravi, M., Paramesh, V., Kaviya, S.R., Anuradha, E., and Solomon, F.D. (2015). 3D  
683 cell culture systems: advantages and applications. *J Cell Physiol* 230, 16-26.
- 684 Selkoe, D.J. (2002). Alzheimer's disease is a synaptic failure. *Science* 298, 789-791.
- 685 Selkoe, D.J. (2003). Folding proteins in fatal ways. *Nature* 426, 900-904.
- 686 Smith, I., Silveirinha, V., Stein, J.L., de la Torre-Ubieta, L., Farrimond, J.A.,  
687 Williamson, E.M., and Whalley, B.J. (2015). Human neural stem cell-derived cultures  
688 in three-dimensional substrates form spontaneously functional neuronal networks. *J*  
689 *Tissue Eng Regen Med*.
- 690 Tang-Schomer, M.D., White, J.D., Tien, L.W., Schmitt, L.I., Valentin, T.M.,  
691 Graziano, D.J., Hopkins, A.M., Omenetto, F.G., Haydon, P.G., and Kaplan, D.L.  
692 (2014). Bioengineered functional brain-like cortical tissue. *Proc Natl Acad Sci U S A*  
693 *111*, 13811-13816.
- 694 Tincer, G., Mashkaryan, V., Bhattarai, P., and Kizil, C. (2016). Neural  
695 stem/progenitor cells in Alzheimer's disease. *Yale J Biol Med* 89, 23-35.
- 696 Tong, L.M., Fong, H., and Huang, Y. (2015). Stem cell therapy for Alzheimer's  
697 disease and related disorders: current status and future perspectives. *Experimental &*  
698 *molecular medicine* 47, e151.
- 699 Tsurkan, M.V., Chwalek, K., Levental, K.R., Freudenberg, U., and Werner, C.  
700 (2011). Modular StarPEG-Heparin Gels with Bifunctional Peptide Linkers. *Macromol*  
701 *Rapid Commun* 31, 1529-1533.
- 702 Tsurkan, M.V., Chwalek, K., Prokoph, S., Zieris, A., Levental, K.R., Freudenberg, U.,  
703 and Werner, C. (2013). Defined polymer-peptide conjugates to form cell-instructive  
704 starPEG-heparin matrices in situ. *Adv Mater* 25, 2606-2610.
- 705 Tsurkan, M.V., Levental, K.R., Freudenberg, U., and Werner, C. (2010).  
706 Enzymatically degradable heparin-polyethylene glycol gels with controlled  
707 mechanical properties. *Chem Commun (Camb)* 46, 1141-1143.
- 708 Venable, J.H., and Coggeshall, R. (1965). A Simplified Lead Citrate Stain for Use in  
709 Electron Microscopy. *J Cell Biol* 25, 407-408.
- 710 Verpelli, C., Carlessi, L., Bechi, G., Fusar Poli, E., Orellana, D., Heise, C.,  
711 Franceschetti, S., Mantegazza, R., Mantegazza, M., Delia, D., *et al.* (2013).  
712 Comparative neuronal differentiation of self-renewing neural progenitor cell lines  
713 obtained from human induced pluripotent stem cells. *Front Cell Neurosci* 7, 175.
- 714 Wieduwild, R., Tsurkan, M., Chwalek, K., Murawala, P., Nowak, M., Freudenberg,  
715 U., Neinhuis, C., Werner, C., and Zhang, Y. (2013). Minimal peptide motif for non-  
716 covalent peptide-heparin hydrogels. *J Am Chem Soc* 135, 2919-2922.
- 717 Wu, T.D., Reeder, J., Lawrence, M., Becker, G., and Brauer, M.J. (2016). GMAP and  
718 GSNAP for Genomic Sequence Alignment: Enhancements to Speed, Accuracy, and  
719 Functionality. *Methods Mol Biol* 1418, 283-334.
- 720 Wyss-Coray, T. (2016). Ageing, neurodegeneration and brain rejuvenation. *Nature*  
721 *539*, 180-186.
- 722 Xia, N., Zhang, P., Fang, F., Wang, Z., Rothstein, M., Angulo, B., Chiang, R., Taylor,  
723 J., and Reijo Pera, R.A. (2016). Transcriptional comparison of human induced and  
724 primary midbrain dopaminergic neurons. *Sci Rep* 6, 20270.
- 725 Young, M.D., Wakefield, M.J., Smyth, G.K., and Oshlack, A. (2010). Gene ontology  
726 analysis for RNA-seq: accounting for selection bias. *Genome biology* 11, R14.
- 727 Yu, G., Wang, L.G., Han, Y., and He, Q.Y. (2012). clusterProfiler: an R package for  
728 comparing biological themes among gene clusters. *OMICS* 16, 284-287.
- 729 Zhang, D., Pekkanen-Mattila, M., Shahsavani, M., Falk, A., Teixeira, A.I., and  
730 Herland, A. (2014). A 3D Alzheimer's disease culture model and the induction of

731 P21-activated kinase mediated sensing in iPSC derived neurons. *Biomaterials* 35,  
732 1420-1428.  
733 Zhang, Y., Fussel, S., Reimer, U., Schutkowski, M., and Fischer, G. (2002).  
734 Substrate-based design of reversible Pin1 inhibitors. *Biochemistry* 41, 11868-11877.  
735  
736

737 **Main figures and legends**

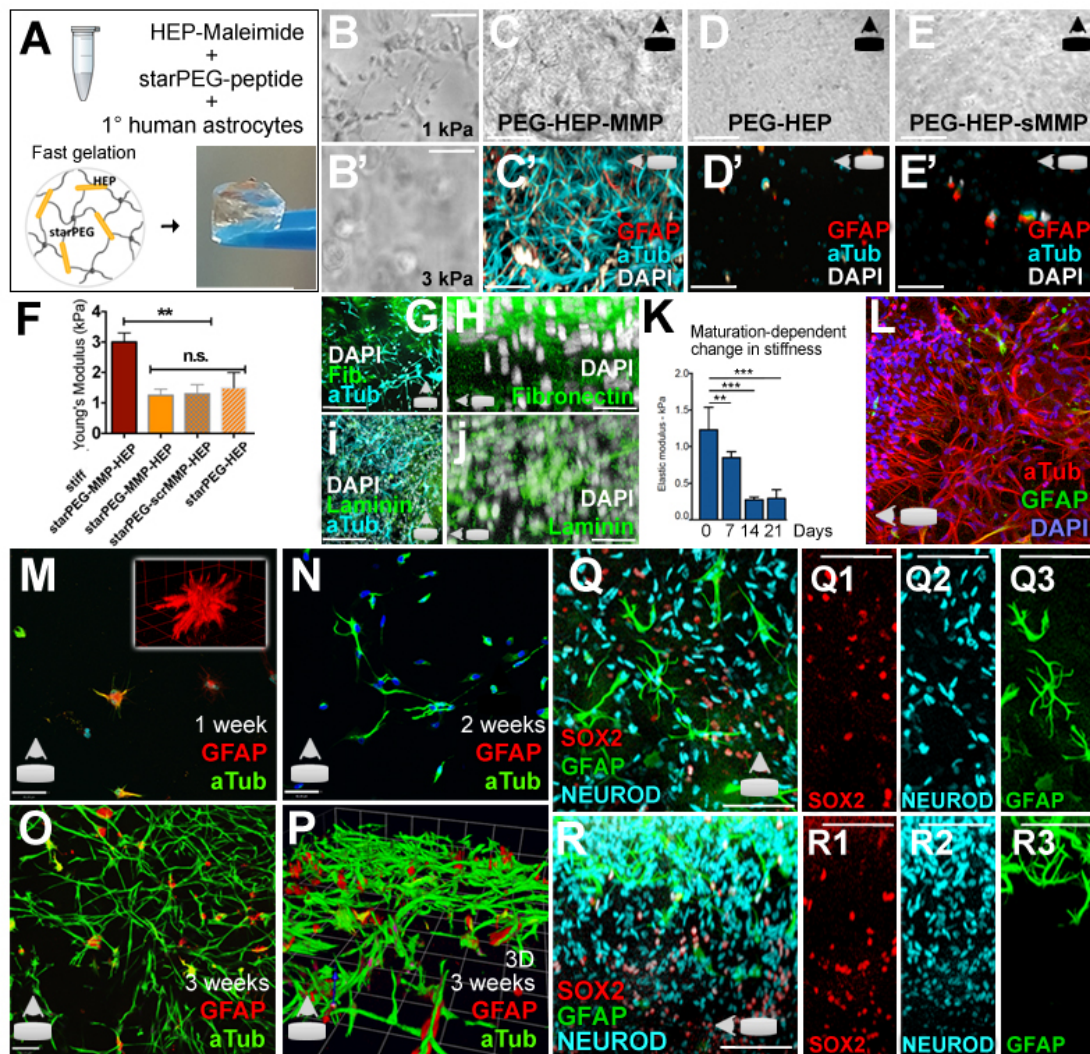

738

739

**Figure 1**

740 *Physical properties and dynamic remodeling of 3D starPEG-Heparin*  
 741 *hydrogels and tissue-mimetic behavior of primary human neural*  
 742 *stem/progenitor cells (NSPCs).*

743

744 (A) Simplified composition and preparation scheme of glycosaminoglycan  
 745 (GAG)-based minimalist multifunctional hydrogels.

746 (B, B') Bright field gel image (BFI) at 1-kPa (B) and 3-kPa (B') stiffness.

747 (C-E') BFI (C,D,E) and immunostaining for acetylated-tubulin (aTub) and  
 748 GFAP (C',D',E') in a 3-week-old gel at 1 kPa stiffness with (C, C'), without  
 749 (D, D') and with scrambled MMP cleavage sites (E, E').

750 (F) Rheological measurements of various gel types.

751 (G) Acetylated-tubulin and fibronectin.

752 (H) Fibronectin.  
 753 (I) Acetylated-tubulin and laminin.  
 754 (J) Laminin.  
 755 (K) Atomic force microscopy-based quantification of elastic modulus in the  
 756 development of the neural networks.  
 757 (L) Maximum projection for TUBB3 and GFAP (X-axis).  
 758 (M-O) Acetylated-tubulin/GFAP staining over the z-axis after 1 (M), 2 (N),  
 759 and 3 (O) weeks of culture.  
 760 (P) 3D representation for acetylated-tubulin and GFAP.  
 761 (Q-R3) Maximum projection images for SOX2, GFAP, and NEUROD1 over  
 762 the Z-axis (Q-Q3) and X-axis (R-R3). Single fluorescent channels are  
 763 shown on the right (Q1-Q3, R1-R3).  
 764 Scale bars: 10  $\mu\text{m}$  for H, J, and M-P; 50  $\mu\text{m}$  for the other figures. Gels: 3  
 765 weeks of culture. See also Supplementary Movies 1, 2, and 3.  
 766  
 767

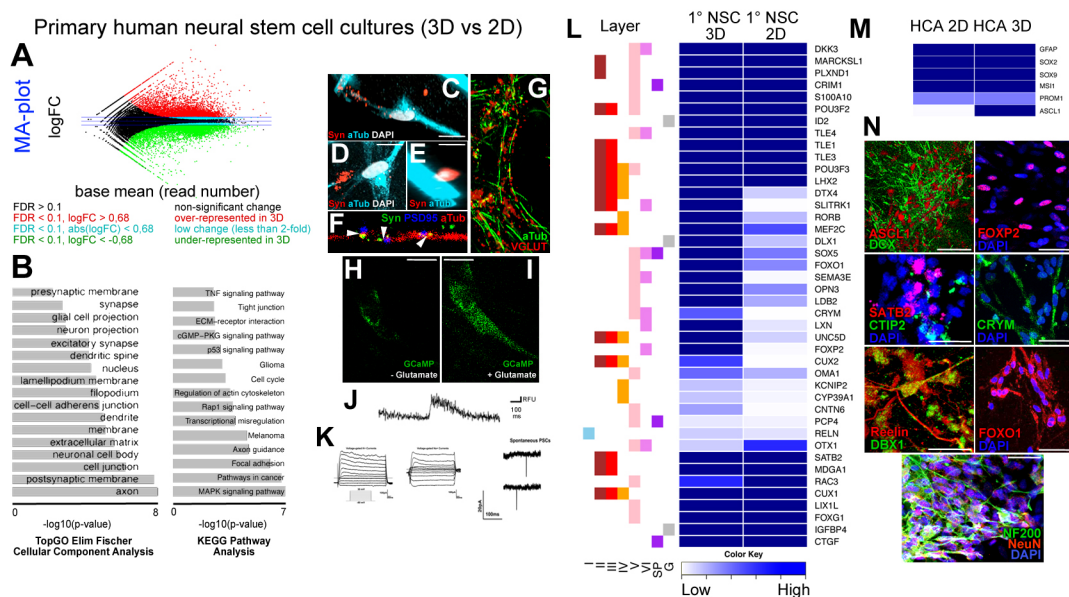

768

769 **Figure 2**

770 *Comparison of gene expression profiles of primary human cortical*  
 771 *astrocytes in 2D and 3D cultures.*

772

773 (A) MA-plot for differentially expressed genes. Red: upregulated in 3D,  
 774 green: downregulated in 3D.

775 (B) KEGG pathway analyses pie chart showing significantly enriched  
776 molecular pathways.

777 (C-E) Synaptophysin and Acetylated tubulin immunostaining in 3D  
778 cultures.

779 (F) Synaptophysin, PSD95 and Acetylated tubulin immunostaining in 3D  
780 cultures.

781 (G) VGLUT1 and Acetylated tubulin immunostaining in 3D cultures.

782 (H) GCaMP6 signal without Glutamate treatment.

783 (I) GCaMP6 signal with Glutamate treatment.

784 (J) Fluorescence intensity histogram. Note the peak at the time of  
785 Glutamate treatment.

786 (K) Patch clamp recordings for Na<sup>+</sup> (left) and K<sup>+</sup> (middle) currents.  
787 Detection of spontaneous firing of neurons (right).

788 (L) Heat map for expression levels of cortical marker genes for 2D and 3D  
789 cultures. Asterisks indicate significant difference between two samples.  
790 Genes are denoted with their respective cortical layer expression with  
791 color codes (left to the heat map).

792 (M) Heat map for expression levels of neural stem cell markers.

793 (N) Immunostaining for ASCL1 (proneural determinant), DCX (early  
794 neuronal marker), SATB2, CTIP2, Reelin (RELN), DBX1, FOXP2, CRYM,  
795 FOXO1 (cortical markers), and Neurofilament (NF200) and NeuN (mature  
796 neuronal markers).

797 Scale bars: 10  $\mu$ m for C-I; 25  $\mu$ m for N. Gels: 3 weeks of culture. See also  
798 Supplementary Datasets 1, 2 and 3.

799

800

801



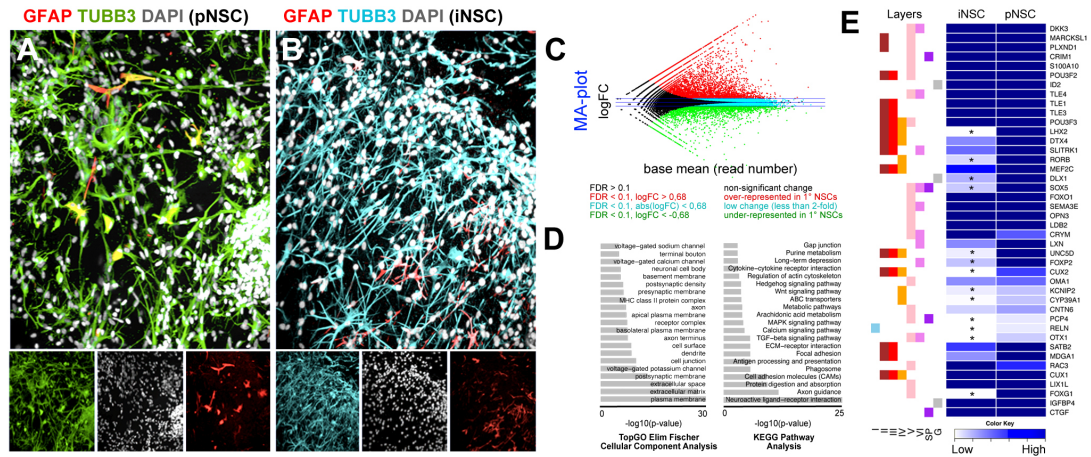

802

803 **Figure 3**

804 *Culture of iPSC-derived neural stem cells in 3D, and comparison of whole*  
 805 *transcriptome profile to primary human neural stem cell-derived cultures.*

806

807 (A) Immunostaining for GFAP (red) and TUBB3 (green) on 3 weeks of 3D  
 808 cultures with primary human cortical astrocytes (neural stem cells). Insets  
 809 below the panel are individual fluorescence channels including DAPI  
 810 (white).

811 (B) Immunostaining for GFAP (red) and TUBB3 (cyan) on 3 weeks of 3D  
 812 cultures with iPSC-derived human neural stem cells. Insets below the  
 813 panel are individual fluorescence channels including DAPI (white).

814 (C) MA-plot for differentially expressed genes in primary over iPSC-  
 815 derived NSC cultures. Red: over-represented in primary cultures, green:  
 816 underrepresented in primary cultures compared to iPSC cultures.

817 (D) KEGG pathway analyses pie chart showing significantly enriched  
 818 molecular pathways in primary cultures compared to iPSC cultures.

819 (E) Heat map for expression levels of cortical marker genes in iPSC and  
 820 primary cultures. Asterisks indicate significant difference between two  
 821 samples. Genes are denoted with their respective cortical layer expression  
 822 with color codes (left to the heat map).

823 Scale bars: 100  $\mu$ m. Gels: 3 weeks of culture.

824 See also Supplementary Datasets 4, 5 and 6.

825

826

827

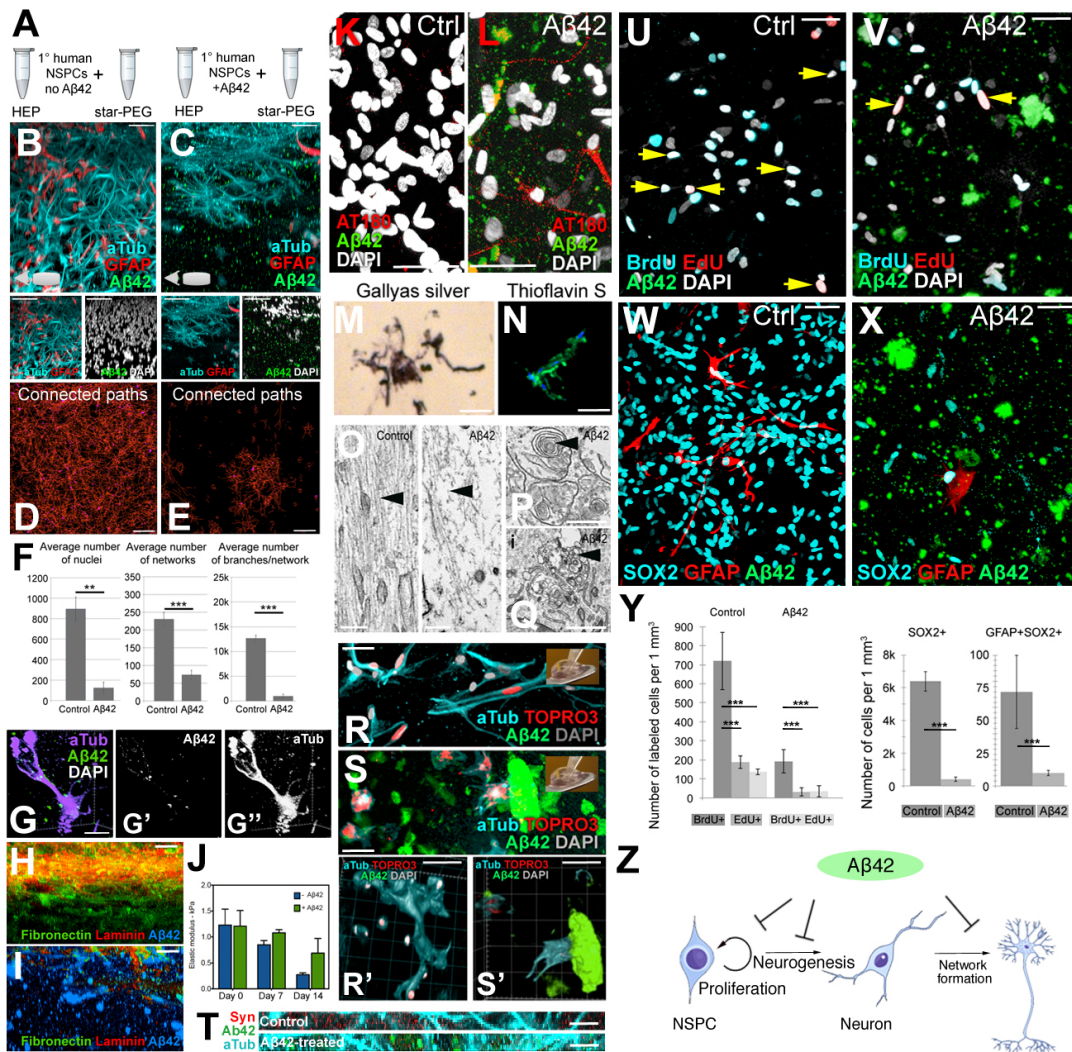

828

829 **Figure 4**

830 *3D hydrogel cultures of primary human NSCs as an Aβ42 toxicity model.*

831

832 (A) Simplified gel preparation/Aβ42 administration scheme.

833 (B,C) X-axis views for Aβ42, Acetylated-tubulin, GFAP in control (B) and  
834 Aβ42 gels (C). Double stainings under the panels.

835 (D,E) Maximum projection of the skeletonized-connected neuronal  
836 pathways in control (D) and Aβ42 gels (E).

837 (F) Quantification.

838 (G-G'') 3D-reconstruction of TUBB3/Aβ42 showing dystrophic axons.

839 (H,I) Fibronectin/laminin in control (H) and Aβ42 gels (I).

840 (J) Time-course atomic force microscopy measurements of stiffness.

841 (K,L) Phospho-Tau (AT180) in control (K) and Aβ42 gels (L).

842 (M) Gallyas silver staining.

843 (N) Thioflavin-S staining in A $\beta$ 42 gels.  
 844 (O) EM images of microtubules in control (left) and A $\beta$ 42 gels (right).  
 845 (P,Q) A $\beta$ 42 depositions (P), and autophagic vacuoles (Q).  
 846 (R-S') Acetylated-tubulin and A $\beta$ 42 in control (R) and A $\beta$ 42 gels (S) after  
 847 transplantation. Transplanted cell nuclei labeled with TOPRO3 (red). 3D-  
 848 reconstruction of R (R') and S (S').  
 849 (T) Acetylated-tubulin, synaptophysin, A $\beta$ 42 in control (upper) and A $\beta$ 42  
 850 gels (lower).  
 851 (U,V) BrdU and EdU in control (U) and A $\beta$ 42 gels (V). Arrows: double-  
 852 positive cells.  
 853 (W,X) SOX2, GFAP, A $\beta$ 42 in control (W) and A $\beta$ 42 gels (X).  
 854 (Y) Quantification of U-X.  
 855 (Z) Schematics for effects of A $\beta$ 42.  
 856 Scale bars: 10  $\mu$ m for G, M, N, T, R, and S; 200 nm for O-Q; 50  $\mu$ m for  
 857 the other figures. Gels: 3 weeks of culture.  
 858 See also Supplementary Movies 4-8.  
 859

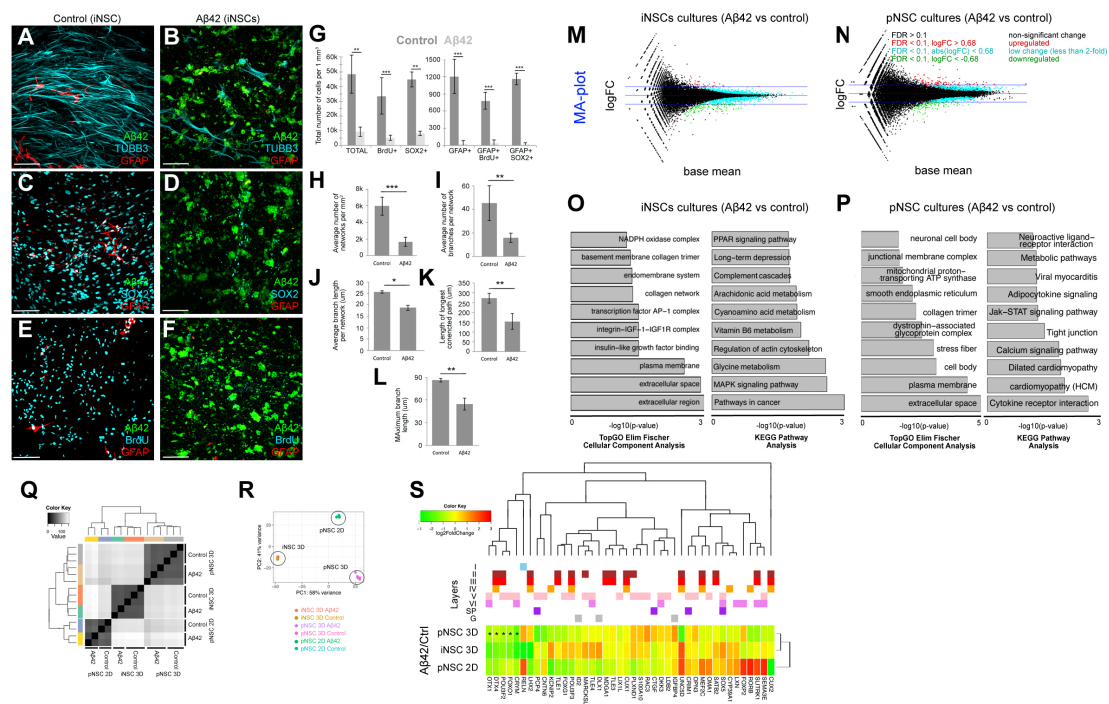

860

## 861 **Figure 5**

862 A $\beta$ 42 toxicity model with iPSC-derived neural stem cells in 3D hydrogels,  
 863 analysis of transcriptional changes, and comparison to pNSC cultures.

864

865 (A) Immunostaining for A $\beta$ 42 (green), TUBB3 (cyan) and GFAP (red) on  
866 control iPSC-derived NSC cultures.

867 (B) Immunostaining for A $\beta$ 42 (green), TUBB3 (cyan) and GFAP (red) on  
868 A $\beta$ 42-treated iPSC-derived NSC cultures.

869 (C) Immunostaining for A $\beta$ 42 (green), SOX2 (cyan) and GFAP (red) on  
870 control iPSC-derived NSC cultures.

871 (D) Immunostaining for A $\beta$ 42 (green), SOX2 (cyan) and GFAP (red) on  
872 A $\beta$ 42-treated iPSC-derived NSC cultures.

873 (E) Immunostaining for A $\beta$ 42 (green), BrdU (cyan) and GFAP (red) on  
874 control iPSC-derived NSC cultures. BrdU is given at 1 week of culture.

875 (F) Immunostaining for A $\beta$ 42 (green), TUBB3 (cyan) and GFAP (red) on  
876 A $\beta$ 42-treated iPSC-derived NSC cultures. BrdU is given at 1 week of  
877 culture.

878 (G) Quantification graph for number of cells in control and A $\beta$ 42-treated  
879 cultures.

880 (H-L) Quantification of average number of networks (H), average number  
881 of branches per network (I), average branch length per network (J),  
882 length of longest connected path (K), and maximum branch length (L).

883 (M) MA-plot for differentially expressed genes in iPSC-derived NSC  
884 cultures after A $\beta$ 42 treatment. Red: upregulated, green: downregulated.

885 (N) MA-plot for differentially expressed genes in primary NSC cultures  
886 after A $\beta$ 42 treatment. Red: upregulated, green: downregulated.

887 (O) KEGG pathway analyses pie chart showing significantly enriched  
888 molecular pathways in iPSC cultures after A $\beta$ 42 treatment. .

889 (P) KEGG pathway analyses pie chart showing significantly enriched  
890 molecular pathways in primary cultures after A $\beta$ 42 treatment.

891 (Q) Heat map for changes in expression levels of cortical marker genes in  
892 iPSC and primary cultures after A $\beta$ 42 treatment. Genes are denoted with  
893 their respective cortical layer expression with color codes (above the heat  
894 map).

895 Scale bars: 100  $\mu$ m. Gels: 3 weeks of culture.

896 See also Supplementary Datasets 7-12.

897

898

## 899 **Materials and Methods**

### 900 **Cell Culture**

901 Astrocytes isolated from the cerebral cortex at gestation week 21 were  
902 obtained from ScienCell Research Laboratory (SRL, Catalog Number 1800,  
903 Carlsbad, CA, USA) at passage one and delivered as frozen stocks. The  
904 cells (from here on primary human neural stem cells, pNSC) are certified  
905 to be negative for HIV-1, HBV, HCV, mycoplasma, bacteria, yeast, and  
906 fungi. PHCCs were seeded on conventional T75 flasks or 24-well plates  
907 and cultured in complete astrocyte medium (AM) composed of Astrocyte  
908 medium (SRL, Catalog Number 1801) supplemented with 2% fetal bovine  
909 serum (SRL, Catalog Number 0010), 1% astrocyte growth supplement  
910 (SRL, Catalog Number 1852) and 1% penicillin/streptomycin solution  
911 (SRL, Catalog Number 0503) in an incubator with a 5% CO<sub>2</sub>/95% air  
912 atmosphere at 37 °C. Human induced neural stem cells (HIP, BC1 line,  
913 Amsbio, catalog number GSC-4311, from here on iNSC) were seeded in  
914 Geltrex pre-coated cultureware in complete AM as described in the above  
915 paragraph.

### 916 **Generation of starPEG-Heparin hydrogels and cell encapsulation**

917 StarPEG-heparin hydrogels were generated as previously described (Maitz  
918 et al., 2013; Wieduwild et al., 2013) with the following modifications:  
919 pNSCs or iNSCs were collected from culture flasks using Accutase  
920 (Invitrogen, CA, USA). After centrifugation (271 g for 10 minutes), cells  
921 were resuspended in PBS at a concentration of  $8 \times 10^6$  cells per ml. For  
922 each hydrogel, we first resuspended the cells in 5  $\mu$ l of PBS, then added 5  
923  $\mu$ l Heparin maleimide conjugate solution (90  $\mu$ g/ $\mu$ l in PBS) and 10  $\mu$ l  
924 starPEG-MMP-peptide conjugate solution (Tsurkan et al., 2011) to a final  
925 volume of 20  $\mu$ l and a cell density of  $2 \times 10^6$  cells/ml. Next, the 20  $\mu$ l  
926 droplet was placed on a Parafilm sheet for approximately two minutes  
927 until it began to gelate. The gels were placed in 24-well plates, and each  
928 well contained 1 ml of astrocyte culture medium (AM) (Supplementary  
929 Movie 8). The gels were cultured and incubated in 5% CO<sub>2</sub>/95% air at 37  
930 °C until the desired time points (1 week, 2 weeks, and 3 weeks).

### 931 **Generation of Matrigel cultures**

932 For the generation of Matrigel cultures, we used BD Matrigel (catalog  
933 number: 356234). Prior to any cell culture work and use of the Matrigel,  
934 pipette tips and Eppendorf tubes has been frozen at -20 °C according to  
935 manufacturer's instruction following the "thick gel method". The BD  
936 Matrigel has been thawed overnight on ice at 4 °C. pNSCs were collected  
937 from culture flasks using Accutase (Invitrogen). After centrifugation (271  
938 g for 10 minutes), pNSCs were re-suspended in BD Matrigel in  
939 concentration  $2 \times 10^6$  cells per ml. Droplets of the cell/Matrigel mix were  
940 placed in the bottom of culture and then waiting to solidify at 37 °C. Then,  
941 cell medium (SRL, Catalog Number 1801) added and the gels cultured for  
942 3 weeks (Supplementary Movie 8). Cell medium changed the day after the  
943 generation of gels and then every other day.

#### 944 **Synthesis of Amyloid peptides**

945 The peptides were synthesized as previously described (Bhattarai et al.,  
946 2017a; Bhattarai et al., 2016; Bhattarai et al., 2017b; Kizil et al., 2015;  
947 Wieduwild et al., 2013). For peptide synthesis, all of the required  
948 chemicals were purchased from IRIS Biotech GmbH (Marktredwitz,  
949 Germany). Acetonitrile (for UPLC/LCMS), dichloromethane (DCM),  
950 diethylether, dimethyl sulfoxide (DMSO), formic acid (FA), trifluoroacetic  
951 acid (TFA), and triisopropylsilane (TIS) were purchased from MERCK KGaA  
952 (Darmstadt, Germany). Acetic anhydride and N-methylmorpholine (NMM)  
953 were purchased from Sigma-Aldrich Co. LLC (St. Louis, MO, USA).  
954 Dithiothreitol (DTT) was obtained from Prolab VWR International, LCC  
955 (Radnor, PA, USA). Acetonitrile (for HPLC) was purchased from TH Geyer  
956 (Renningen, Germany). 5(6)-Carboxyfluorescein was purchased from  
957 Acros Organics (Fisher Scientific Company LLC). The TentaGel S RAM  
958 Fmoc rink amide resin was purchased from RappPolymere GmbH  
959 (Tübingen, Germany). The peptide synthesis columns and syringes with  
960 included filters were purchased from Intavis AG (Cologne, Germany).  
961 Water was obtained from a Milli-Q water purifier (Milli-Q Advantage A10,  
962 EMD Millipore Corporation, Billerica, MA, USA) with a LCPAK0001 Milli-Q  
963 filter. The polytetrafluoroethylene (PTFE) filter, polyvinylidene fluoride  
964 (PVDF) syringe filter, and filter holder were purchased from Sartorius  
965 Stedtim (Aubagne, France).

966 A $\beta$ 42 peptides were prepared using standard 9-fluorenylmethoxycarbonyl  
967 (Fmoc) chemistry with 2-(1H-benzotriazol-1-yl)-1,1,3,3-  
968 tetramethyluronium hexafluorophosphate (HBTU) activation on an  
969 automated solid-phase peptide synthesizer (ResPep SL,  
970 Intavis)(Wieduwild et al., 2013; Zhang et al., 2002). Each amino acid was  
971 coupled twice at 5-fold excess followed by capping the non-reacted amino  
972 groups with acetic anhydride to achieve high quality synthesis. Upon  
973 completion of the peptide synthesis, 5(6)-carboxyfluorescein was coupled  
974 to the N-terminus using HBTU as the coupling reagent. The peptide was  
975 then cleaved from the resin with TFA/TIS/water/DTT  
976 (90(v/v):5(v/v):2.5(v/v):2.5(m/v)) for 2 hours. The product was  
977 precipitated and washed with ice-cold diethyl ether.

978 The peptide was dissolved in Milli-Q water, and peptide purification was  
979 performed via reverse-phase high-pressure liquid chromatography (HPLC)  
980 on a semi-preparative HPLC (Waters) equipped with a semi-preparative  
981 column (PolymerX RP-1, 250 x 10 mm, Phenomenex). The peptide was  
982 eluted from the column by applying a gradient of 5% to 100% solvent B  
983 over 30 min at 20 ml/min, in which solvent A is 0.1% TFA in water and  
984 solvent B is 0.1% TFA and 5% water in acetonitrile.

985 Purity was confirmed on an analytical reverse phase ultra-high pressure  
986 liquid chromatograph (UPLC Aquity with UV Detector) equipped with an  
987 analytical C18 column (Acquity UPLC BEH C18, bead size 1.7  $\mu$ m, 50 x 2.1  
988 mm) using an isocratic gradient and electrospray ionization mass  
989 spectrometry (ESI-MS) (Acquity TQ Detector).

## 990 **A $\beta$ 42 treatment**

991 The A $\beta$ 42 treatment was performed 24 h post-thaw for a period of 48 h at  
992 10  $\mu$ M final concentration for pNSCs and iNSCs in 3D cultures. Amyloid  
993 plaques remain in the culture attached to the cells throughout the  
994 cultures. The medium was removed and the cells were washed with PBS  
995 after 48 h A $\beta$ 42 treatment. Then, the cells were collected using Accutase,  
996 counted and centrifuged at 271 g for 10 min. The cell pellet was  
997 resuspended in PBS to obtain at  $8 \times 10^6$  cells/ml. This cell suspension was  
998 mixed with an equal volume of 6.00 mM heparin maleimide conjugate in

999 PBS to obtain a 3.00 mM heparin maleimide conjugate-cell suspension  
1000 mix at  $4.0 \times 10^6$  cells/ml. 10  $\mu$ l of this mix was combined with 10  $\mu$ l of  
1001 2.25 mM starPEG-MMP-peptide conjugate solution in PBS (Tsurkan et al.,  
1002 2011), quickly triturated a few times, and the resulting 20  $\mu$ l volume was  
1003 pipetted onto a Parafilm sheet forming a droplet. This droplet was allowed  
1004 to gelate for about 2 min resulting in formation of a 20  $\mu$ l hydrogel  
1005 containing 40,000 cells ( $2.0 \times 10^6$  cells/ml) at a final concentration of 1.50  
1006 mM heparin maleimide conjugate and 1.12 mM starPEG-MMP-peptide  
1007 conjugate. The gels were then placed in 0.75 ml of AM culture medium  
1008 per well in 24-well plates, and incubated in 5% CO<sub>2</sub>/95% air at 37 °C  
1009 until the desired time points (1 week, 2 weeks, and 3 weeks). The  
1010 medium was changed 3 times a week throughout the incubation period.

1011 2D pNSC cultures were treated with 2  $\mu$ M A $\beta$ 42 in the culture medium for  
1012 48 hours between second and fourth days of culture. The medium is  
1013 removed and cells are washed with cell culture medium twice. Amyloid  
1014 plaques remain in the culture attached to the cells throughout the  
1015 cultures. New medium is added and cultures were continued.

#### 1016 **Transplantation**

1017 Primary human neural stem cells (pNSCs) were cultured for two days and  
1018 treated with TOPRO-3 (Thermo Scientific) for 1 hour before  
1019 transplantation. After a washing step, the cells were harvested with  
1020 Accutase and re-suspended in astrocyte cell culture medium at  $3 \times 10^5$   
1021 cells per ml. With a pipette tip, 2  $\mu$ l of the cell suspension was injected  
1022 into the center of the hydrogel. After a week of culture, the hydrogels  
1023 were fixed and processed for immunocytochemistry.

#### 1024 **Immunocytochemistry**

1025 All of the hydrogels were fixed with ice-cold 4% paraformaldehyde and  
1026 incubated for 1.5 hours at room temperature followed by washing in PBS  
1027 overnight at 4 °C. For immunocytochemistry, the hydrogels were blocked  
1028 and permeabilized in blocking solution for 4 hours at room temperature.  
1029 For BrdU-treatment, the gels were incubated with 2 M HCl for 20 minutes  
1030 at 37 °C followed by three washes in PBS (2 hours each). EdU staining  
1031 was performed according to the manufacturer's protocol (Life



1032 Technologies, C10638) using a 1-hour incubation step. The hydrogels  
1033 were incubated with primary antibodies (Supplementary Table 1) in  
1034 blocking solution overnight at 4 °C. The gels were washed for two  
1035 subsequent days at 4 °C, with occasional changes of the PBS. After  
1036 washing, the gels were incubated with the secondary antibodies (1:500 in  
1037 blocking solution) at room temperature for 6 hours. After 3 washing steps  
1038 of 2 hours each, DAPI staining was performed (1:3000 in PBS, 2 hours at  
1039 room temperature). Immunostaining for SOX2 (Santa Cruz Biotechnology,  
1040 1:100), SATB2 (Abcam, 1:300), ASCL1 (Neuromics, 1:100), CTIP2  
1041 (Abcam, 1:100), EEA1 (Abcam, 1:500), neurofilament (NF-M+H+L) (Life  
1042 Technologies, 1:500), TUBB3 (R&D Systems, 1:500), CASP3 (Santa Cruz  
1043 Biotechnology, 1:500), MKI67 (Abcam, 1:1000), acetylated tubulin  
1044 (Sigma, 1:500), SYN (Millipore, 1:500), GFAP (Novex, 1:500), DCX  
1045 (Novex, 1:300), MAPT (Abcam, 1:500), A $\beta$ 42 (Cell Signaling Technology,  
1046 host: Rabbit, 1:500), Reelin (Abcam, 1:500), FOXO1 (Thermo Scientific,  
1047 1:500), FOXP2 (R&D, 1:200), CRYM (Thermo Fischer, 1:50), PSD95  
1048 (Thermo Fischer, 1:300), DBX1 (Abcam, 1:300), VGLUT1 (Thermo  
1049 Fischer, 1:500), BrdU (AdB Serotec, 1:500) was performed. All of the  
1050 secondary antibodies were conjugated to AlexaFluor dyes (Life  
1051 Technologies).

## 1052 **Fluorescent imaging**

1053 For the hydrogels, fluorescent imaging was performed using a Leica SP5  
1054 inverted Laser Scanning Confocal microscope. The hydrogels were placed  
1055 in glass bottom Petri dishes. Sixty microliters of PBS were added on top of  
1056 the hydrogels to avoid desiccation. The Z-stacks were captured using a  
1057 25x water immersion lens. Every Z-stack had a z-distance of 500  $\mu$ m.  
1058 Monolayers were imaged using an inverted Zeiss Apotome 2 microscope.

## 1059 **Histological analyses**

1060 For Gallyas silver staining, the 3D hydrogels were cryo-frozen and  
1061 sequentially incubated in 5% periodic acid (5 minutes), an alkaline silver  
1062 iodide solution (1 minute), acetic acid (3 minutes), 0.1% gold chloride (5  
1063 minutes), 1% sodium thiosulfate (5 minutes), and 2.5% aluminum sulfate  
1064 (1 minutes), with intermittent washes with distilled water. For Thioflavin S

1065 staining, samples were incubated in 1% Thioflavin S (8 minutes), absolute  
1066 ethanol (3 minutes), and DAPI (10 minutes).

### 1067 **Transfection with GCaMP6f plasmids and calcium imaging**

1068 TurboFectin 8.0 reagent (OriGene, Cat# TF81001) was used to transfect  
1069 adherent (2D cultures) and encapsulated (3D cultures) cells with 700  $\mu$ g  
1070 plasmid per reaction in 1 ml of cell growth medium. The pGP-CMV-  
1071 GCaMP6f plasmid was a gift from Douglas Kim (Addgene plasmid #  
1072 40755)(Chen et al., 2013). The images were captured using a Leica SP5  
1073 inverted Laser Scanning Confocal microscope in resonant scanner mode  
1074 with photon counting. Images were acquired every 100 milliseconds.  
1075 Analysis of the calcium image spectrum was performed with the Leica LAS  
1076 AF software by using region of interests (ROIs) and photon counting.

### 1077 **Patch clamp recordings**

1078 Single neurons were recorded in Artificial Cerebrospinal Fluid (ACSF) (119  
1079 mM NaCl, 2.5 mM KCl, 2 mM CaCl<sub>2</sub>, 1.3 mM MgCl<sub>2</sub>, 1 mM NaH<sub>2</sub>PO<sub>4</sub>, and 10  
1080 mM glucose, pH 7.3) and patched with nerve solution (125 mM K<sup>+</sup>-  
1081 gluconate, 0.1 mM CaCl<sub>2</sub>, 0.6 mM MgCl<sub>2</sub>, 8 mM NaCl, 1 mM EGTA, 0.01  
1082 mM HEPES, and 4 mM Na-ATP, pH 7.23) The Whole-cell patch recordings  
1083 were assessed using a HEKA set up and Pulse program. Membrane voltage  
1084 resistance was held at -80 mV with the pipette resistance of 4-6 MOhms.  
1085 For measurements of K<sup>+</sup> and Na<sup>+</sup> currents, test pulses were applied in 80  
1086 ms durations from -80 mV to 30 mV every 2 s. All experiments were done  
1087 at 20-23 °C.

### 1088 **Electron microscopy**

1089 For electron microscopy, the hydrogel-embedded cells were fixed in  
1090 modified Karnovsky's fixative (2% glutaraldehyde + 2%  
1091 paraformaldehyde in 50 mM HEPES) at least overnight at 4 °C. The  
1092 samples were washed 2x in 100 mM HEPES and 2x in water and postfixed  
1093 in a 2% aqueous OsO<sub>4</sub> solution containing 1.5% potassium ferrocyanide  
1094 and 2 mM CaCl<sub>2</sub> for 30 min on ice. Next, washes in water, 1%  
1095 thiocarbohydrazide in water (20 minutes at room temperature), water,  
1096 and a second osmium contrasting step in 2% OsO<sub>4</sub>/water (30 minutes on  
1097 ice). After several washes in water, the samples were *en bloc* contrasted

1098 with 1% uranyl acetate/water for 2 hours on ice, washed again in water,  
1099 dehydrated in a graded series of ethanol/water up to 100% ethanol, and  
1100 infiltrated with Epon 812 (Epon/ethanol mixtures: 1:3, 1:1, 3:1 for 1.5  
1101 hours each, pure Epon overnight, and pure Epon for 5 hours). The  
1102 samples were embedded in flat embedding molds and cured overnight at  
1103 65 °C. Ultrathin sections were prepared with a Leica UC6 ultramicrotome  
1104 (Leica Microsystems, Vienna, Austria), collected on Formvar-coated slot  
1105 grids and stained with lead citrate and uranyl acetate as previously  
1106 described(Venable and Coggeshall, 1965).

1107 For CLEM, cells that were embedded in the hydrogels with the fluorescein-  
1108 labeled peptide were fixed with 4% paraformaldehyde in 100 mM  
1109 phosphate buffer (PB). After several washes in water, the samples were  
1110 dehydrated in 50% (15 minutes at 4 °C), 70%, 90%, and 100% acetone  
1111 (45 minutes each at -25 °C) and incubated with LR Gold (London Resin  
1112 Company, Reading, UK) solutions of 33% and 66% LR Gold/acetone, pure  
1113 LR Gold (1 hour each at -25 °C), and LR Gold + 0.1% benzil (1 hour,  
1114 overnight at -25 °C). Finally, the samples were transferred to LR Gold-  
1115 containing 1% benzil and polymerized using the UV lamp of the Leica  
1116 AFS2 freeze substitution unit (Leica Microsystems, Vienna, Austria) for 48  
1117 hours at -25 °C. Ultrathin sections were mounted on Formvar-coated EM  
1118 grids, stained with DAPI, imaged with a wide field fluorescence  
1119 microscope, washed, and contrasted with 1% uranyl acetate for EM as  
1120 previously described(Fabig et al., 2012). Contrasted ultrathin sections  
1121 were analyzed on a FEI Morgagni D268 (FEI, Eindhoven, The Netherlands)  
1122 or a Jeol JEM1400 Plus at 80 kV acceleration voltage.

### 1123 **Atomic force microscopy**

1124 Atomic force microscopy (AFM) was performed to determine the  
1125 mechanical properties of the gels. Briefly, AFM measurements were  
1126 collected at 37 °C using a Nanowizard II AFM (JPK Instruments, Berlin,  
1127 Germany). Tipless silicon nitride cantilevers with a nominal spring  
1128 constant of 80 mN\*m<sup>-1</sup> (PNP-TR-TL-Au; Nanoworld) were used. The  
1129 cantilevers were modified with silica beads (Æ10 µm, Kisker Biotec  
1130 GmbH), as previously described (Bray et al., 2015). Force-distance curves  
1131 were acquired in closed loop, constant height mode using a 3 nN contact

1132 force and a 5  $\mu\text{m/s}$  approach/retract velocity. Each data set was  
1133 generated by probing a minimum of 70 different spots on each sample.  
1134 The data processing software provided by the AFM manufacturer (JPK  
1135 Instruments) was used to extract the Young's Modulus  $E$  from the  
1136 approach force–distance curves.

### 1137 **RNA Isolation**

1138 RNA isolation from 2D cell culture was performed by TriZol (Invitrogen).  
1139 Total RNA isolation from 3D gels was performed by Norgen Total RNA  
1140 isolation Kit (Cat#17200). 5 gels were lysed in 1ml RL buffer with 10  $\mu\text{L}$   
1141  $\beta$ -mercaptoethanol, and after centrifugation at 12,000g for 7 min at room  
1142 temperature, the supernatant was collected in a new Eppendorf and  
1143 mixed with absolute Ethanol. The remaining steps performed as  
1144 previously described (Bhattarai et al., 2016).

### 1145 **Next generation sequencing of whole transcriptome**

1146 cDNA libraries were prepared by following the protocol for NEBNext®  
1147 Ultra I Directional RNA Library Prep Kit. This involves the following steps:  
1148 mRNA isolation via poly(A)+ selection and fragmentation, first strand and  
1149 second strand cDNA synthesis, purification using the Agencourt®  
1150 AMPure® Kit and end repair/dA-tailing of cDNA. Adapters were ligated to  
1151 the dA-tailed cDNA, followed by an size selection using AMPure XP Beads.  
1152 Indexing of the library constructs was done with illumina® index primer  
1153 during the following PCR amplification using NEBNext® Q5 2X PCR Master  
1154 Mix. Lastly, libraries were purified using the Agencourt® AMPure® Kit.  
1155 Libraries were pooled and sequenced on an illumina® NextSeq 500  
1156 system, resulting in ca. 27 – 38 million 75 bp single-end reads. All  
1157 protocols are performed according to the manufacturers' instructions.

### 1158 **Data Analysis**

1159 The reads in fastq files were aligned to the human genome  
1160 (hg19/GRCh38) with gsnap (version 2016-09-23) (Wu et al., 2016), and  
1161 featureCounts (v1.5.3) (Liao et al., 2013, 2014) was used to assign reads  
1162 to each gene using Ensembl version 90 [Homo\_sapiens.GRCh38.90.gtf].  
1163 DESeq2 (1.18.0) (Love et al., 2014) was used to normalize the reads,  
1164 calculate fold changes and p-values. 2-fold change and padj value of less

1165 than 0.1 were used to identify differentially expressed genes. For KEGG  
1166 pathway analysis GStats (2.44.0) (Falcon and Gentleman, 2007), GOSep  
1167 (1.30.0) (Young et al., 2010), and clusterProfiler (3.6.0) (Yu et al., 2012)  
1168 were used. topGO (2.30.0) (Alexa et al., 2006) was used for GO analysis  
1169 and pathview (1.18.0) (Luo and Brouwer, 2013) was used for drawing  
1170 KEGG pathway. All data analysis pipeline scripts were written in R in our  
1171 lab, and are available upon request.

## 1172 **Sequencing datasets**

1173 All deep sequencing experiments (pNSC 2D, pNSC 3D, iNSC 3D control  
1174 and Amyloid-beta42-treated) can be found under the GEO accession  
1175 number GSE78117.

## 1176 **Image analysis and statistics**

1177 The 3D reconstructions of hydrogel images and videos were generated  
1178 using Arivis 4D software. Images from monolayers were processed using  
1179 Zeiss ZEN software. The statistical analyses were performed using  
1180 GraphPad Prism and two-tailed Student's t-tests. The levels of significance  
1181 were \*:  $p \leq 0.05$ , \*\*:  $p \leq 0.01$ , and \*\*\*:  $p \leq 0.001$ . In all graphs, means  
1182  $\pm$  standard deviations are shown.

1183 The effect size was calculated using G-Power, and the sample size was  
1184 estimated with n-Query. The data conforms to normal distribution as  
1185 determined by Pearson's chi-squared test. The variations between the  
1186 samples are similar as determined by variance estimation using Microsoft  
1187 Excel software. For 3D gels, 9 gels were used for quantifications (3  
1188 technical replicates in every experiment, and 3 experiments as biological  
1189 replicates). All experiments were replicated many times in the laboratory  
1190 and results were confirmed independently (80-120 gels were qualitatively  
1191 analyzed to check the consistency of the results for every individual  
1192 experiment).

## 1193 **Generation of skeletonized networks and quantification**

1194 To examine the axons of neural cells, the length and branching were  
1195 obtained by thinning binary images to a skeleton, which was performed in  
1196 all three dimensions. In detail, the raw images were processed with a  
1197 Gaussian filter and then with the tubeness filter to enhance linear

1198 structures. Then, an automatic threshold was applied, followed by several  
1199 morphological operations to facilitate the skeletonization. Fiji software  
1200 ([www.fiji.sc](http://www.fiji.sc)) was used for image processing. Skeletons were quantified  
1201 using KNIME freeware (Supplementary Figure 4).

1202 **Supplementary Information**

1203 Supplementary Figure 1-5

1204 Supplementary Movies 1-8

1205 Supplementary Dataset 1-12

1206

1207 **Supplementary figures**

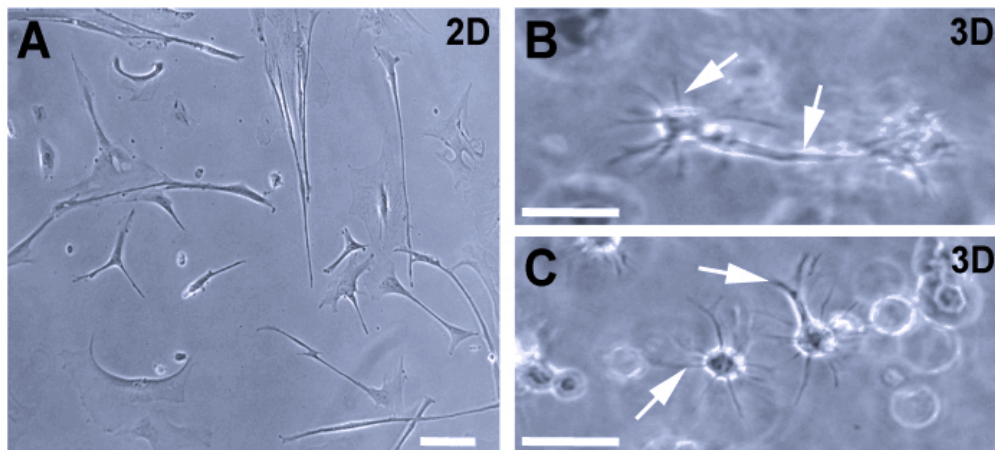

1208

1209 **Supplementary Figure 1**

1210 *Formation of 3D topology and arborizations in starPEG-Heparin gels*

1211

1212 (A) Culture of primary human NSCs in 2D.

1213 (B,C) Culture of primary human NSCs in 3D. Note the arborized  
1214 morphology and cellular processes reminiscent of in vivo (white arrows).

1215 Scale bars 25  $\mu\text{m}$ . Related to Figure 1.

1216

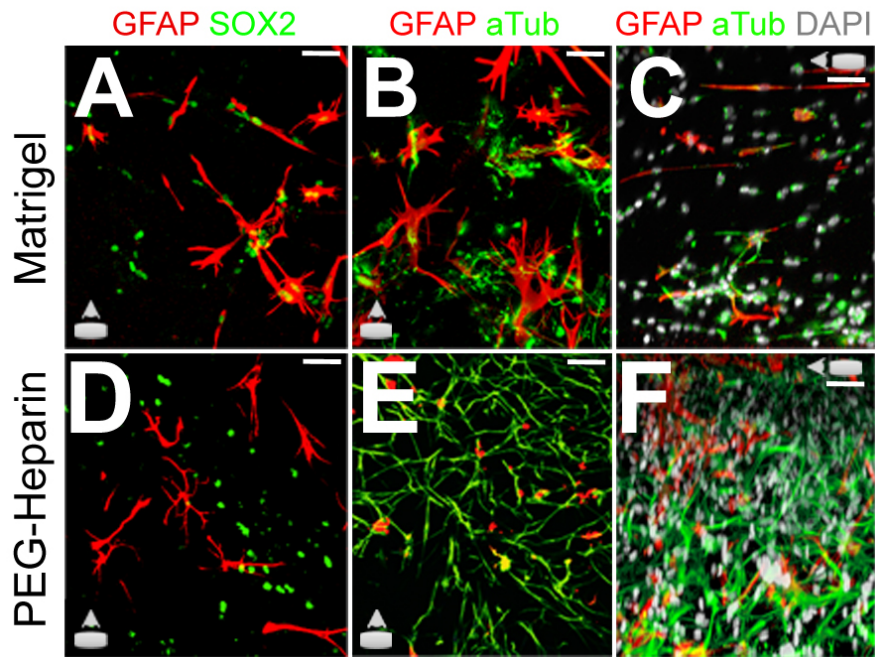

1217

1218

**Supplementary Figure 2**

1219

*Comparison of Matrigel and starPEG-Heparin cultures*

1220

1221

(A) Immunostaining for GFAP and SOX2 in Matrigel cultures.

1222

(B) Immunostaining GFAP and Acetylated tubulin in Matrigel cultures Z-view.

1223

1224

(C) Immunostaining GFAP and Acetylated tubulin in Matrigel cultures X-view.

1225

1226

(D) Immunostaining for GFAP and SOX2 in starPEG-Heparin cultures.

1227

(E) Immunostaining GFAP and Acetylated tubulin in starPEG-Heparin cultures Z-view.

1228

1229

(F) Immunostaining GFAP and Acetylated tubulin in starPEG-Heparin cultures X-view.

1230

1231

Scale bars: 20  $\mu$ m. All gels are 3 weeks of culture.

1232



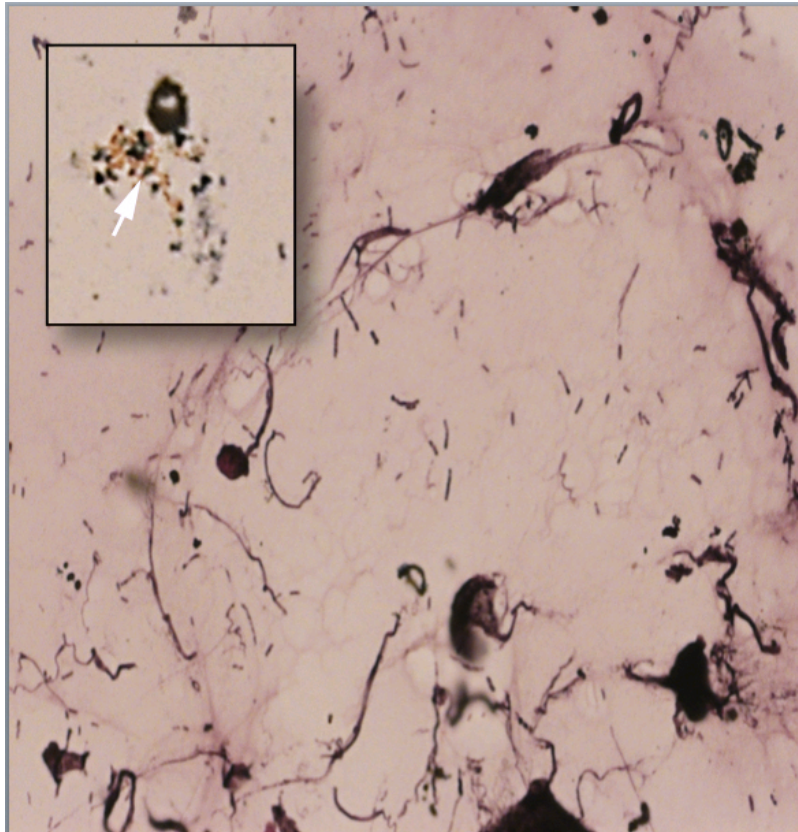

1233

1234 **Supplementary Figure 3**

1235 *Formation of neurofibrillary tangles and senile plaques in 3D cultures of*  
1236 *primary human NSCs.*

1237

1238 Image shows Gallyas silver impregnation staining for neurofibrillary  
1239 tangles in 3D cultures. Inset shows the senile plaques (white arrow).

1240

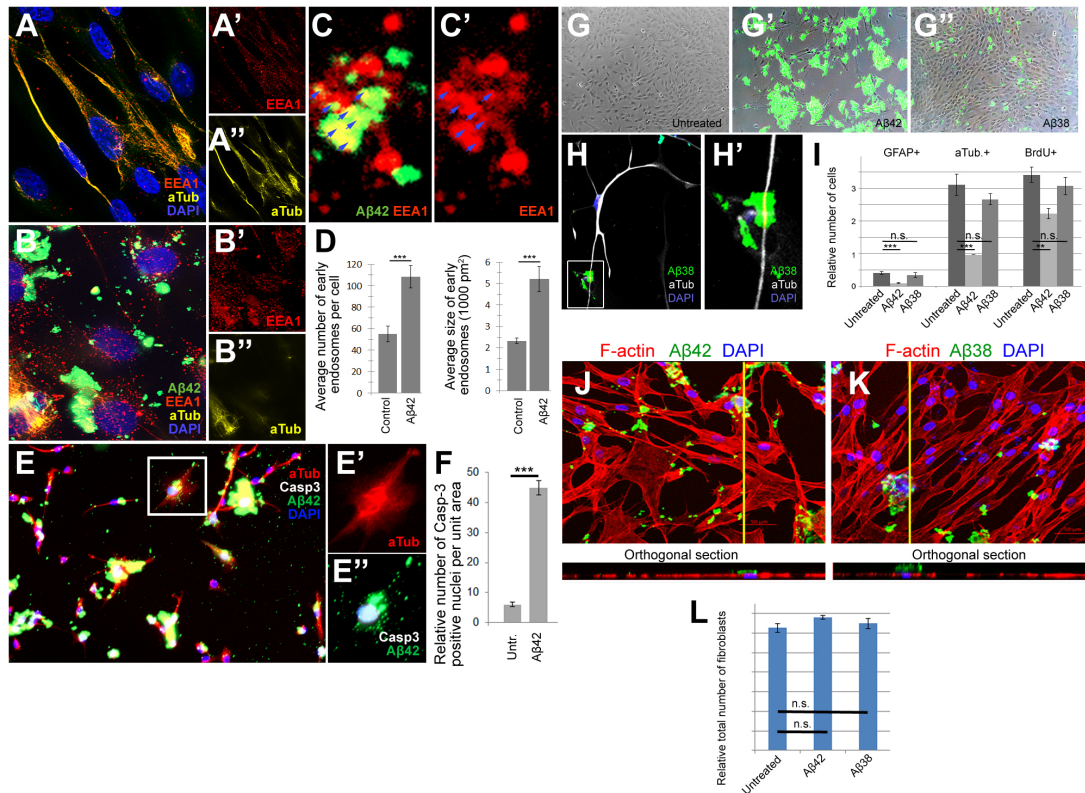

1241

1242 **Supplementary Figure 4**

1243 *Amyloid aggregation dynamics*

1244

1245 (A) Immunostaining for acetylated tubulin and early endosomes (EEA1) in  
1246 control cultures.

1247 (A', A'') Individual fluorescence channels for EEA1 and acetylated tubulin  
1248 in control cultures.

1249 (B) Immunostaining for acetylated tubulin and early endosomes (EEA1) in  
1250 Aβ42-treated cultures.

1251 (B', B'') Individual fluorescence channels for EEA1 and acetylated tubulin  
1252 in Aβ42-treated PHCCs.

1253 (C, C') Co-localization of EEA1 and Aβ42.

1254 (D) Quantification of the average number of early endosomes per cell and  
1255 the average size of early endosomes per cell in control and Aβ42-treated  
1256 cultures.

1257 (E) Immunostaining of Aβ42-treated cells for acetylated tubulin (red),  
1258 Aβ42 (green) and caspase-3 (white).

1259 (E') Individual fluorescence channel for acetylated tubulin.

1260 (E'') Fluorescence channels for Aβ42 and Caspase-3.

- 1261 (F) Quantification of Caspase-3-positive cells in control and A $\beta$ 42-treated  
1262 cultures.
- 1263 (G) Bright field image of control cultures.
- 1264 (G') Bright field image of A $\beta$ 42-treated cultures.
- 1265 (G'') Bright field image of A $\beta$ 38-treated cultures.
- 1266 (H) Confocal image of acetylated tubulin immunostaining on A $\beta$ 38-treated  
1267 cultures.
- 1268 (H') Close-up of a region from H showing cells treated with A $\beta$ 38.
- 1269 (I) Quantification of the relative number of untreated, A $\beta$ 42-treated and  
1270 A $\beta$ 38-treated cells immunoreactive for GFAP, acetylated tubulin or BrdU.
- 1271 (J) Confocal image over the z-axis and orthogonal section over the y-axis  
1272 of A $\beta$ 42-treated human-derived fibroblasts. F-actin was stained with  
1273 phalloidin, and DNA was stained with DAPI.
- 1274 (K) Confocal image over the z-axis and orthogonal section over the y-axis  
1275 of A $\beta$ 38-treated human-derived fibroblasts. F-actin was stained with  
1276 phalloidin, and DNA was stained with DAPI.
- 1277 (L) Quantification of the relative total number of fibroblasts in control,  
1278 A $\beta$ 42-treated and A $\beta$ 38-treated samples.
- 1279 Scale bars 20  $\mu$ m. Related to Figure 4.
- 1280

```
1 title = getTitle();
2 dir = getDirectory("image");
3 getVoxelSize(width, height, depth, unit);
4 run("Duplicate...", "title=Duplicate duplicate channels=2");
5 selectWindow(title);
6 close();
7 selectWindow("Duplicate");
8 run("Gaussian Blur...", "sigma=0.85 stack");
9 run("Tubeness", "sigma=3");
10 setAutoThreshold("Triangle dark stack");
11 setOption("BlackBackground", false);
12 run("Convert to Mask", "method=Triangle background=Dark black");
13 run("Invert LUT");
14 run("Options...", "iterations=6 count=3 pad do=Close");
15 run("Erode (3D)", "iso=255");
16 run("Dilate (3D)", "iso=255");
17 run("Dilate (3D)", "iso=255");
18 run("Erode (3D)", "iso=255");
19 run("Skeletonize (2D/3D)");
20 setVoxelSize(width, height, depth, unit);
21 run("Analyze Skeleton (2D/3D)", "prune=none calculate");
22 newtitle = substring(title,0,lastIndexOf(title, ".lif"));
23 saveAs("results", dir+newtitle+".xls");
24 selectWindow("Tagged skeleton");
25 saveAs("Tiff", dir+newtitle+"_skel.tif");
26 //run("Close All");
```

1281

1282 **Supplementary Figure 5**

1283 *Script for KNIME software*

1284

1285

1286

1287

1288 **Supplementary Movies**

1289

1290 **Supplementary Movie 1**

1291 *Neuronal network in pNSC cultures*

1292

1293 3D representation of a 0.18 mm<sup>3</sup> portion of a control hydrogel containing  
1294 networks of neurons as assessed by acetylated tubulin staining (cyan).  
1295 Related to Figure 1.

1296

1297 **Supplementary Movie 2**

1298 *Neuronal network in iNSC cultures*

1299

1300 3D reconstruction of iPSC-derived NSC cultures in PEG-Heparin gels.  
1301 Cyan: acetylated tubulin, white: DAPI, red: GFAP. Related to Figure 1.

1302

1303 **Supplementary Movie 3**

1304 *Calcium activity*

1305

1306 Encapsulated primary human cortical astrocytes in PEG-HEP gels  
1307 transfected with the GCaMP6f Calcium sensor exhibit green fluorescence  
1308 in response to calcium influx after treatment with glutamate. Related to  
1309 Figure 1.

1310

1311 **Supplementary Movie 4**

1312 *Dystrophic axons*

1313

1314 A TUBB3-positive neuron (cyan) with retracted processes, dystrophic  
1315 axonal ends, and A $\beta$ 42 aggregation (green) is shown in a 3D  
1316 reconstruction. DAPI is shown in white. Related to Figure 2.

1317

1318 **Supplementary Movie 5**

1319 *3D reconstruction of a neuron with hyperphosphorylated Tau*

1320

1321 A 3D reconstruction of primary human cortical astrocyte cultures after 3  
1322 weeks in A $\beta$ 42-treated gels and staining for A $\beta$ 42 (green), DAPI (white)

1323 and phosphorylated Tau (AT180, red). Note that neurons exhibit staining  
1324 for hyperphosphorylated Tau. Related to Figure 2.

1325

1326 **Supplementary Movie 6**

1327 *Transplantation in control gels*

1328

1329 3D reconstruction of a labeled neuron (red nuclei, transplanted) that  
1330 established connections to the existing neurons in the control gels. Cyan:  
1331 acetylated tubulin, white: DAPI, red: TOPRO3. Related to Figure 2.

1332

1333 **Supplementary Movie 7**

1334 *Transplantation in Amyloid-containing gel*

1335

1336 3D reconstruction of a labeled neuron (red nuclei, transplanted) that was  
1337 unable to make connections with the existing, already dystrophic, neurons  
1338 in amyloid-containing gels. Green: A $\beta$ 42, cyan: acetylated tubulin, white:  
1339 DAPI, red: TOPRO3. Related to Figure 2.

1340

1341 **Supplementary Movie 8**

1342 *Comparison of gel preparation*

1343

1344 Comparison of preparation of starPEG-Heparin and Matrigel cultures of  
1345 primary human astrocytes. Related to Figure 2.

1346

1347

1348

1349

1350 **Supplementary Datasets**

1351

1352 **Supplementary Dataset 1**

1353 Differential expression analyses between pNSC 3D cultures and pNSC 2D  
1354 cultures.

1355

1356 **Supplementary Dataset 2**

1357 Elim Fischer cellular component analyses of differentially expressed genes  
1358 between pNSC 3D cultures and pNSC 2D cultures.

1359

1360 **Supplementary Dataset 3**

1361 KEGG pathway analysis of differentially expressed genes between pNSC  
1362 3D cultures and pNSC 2D cultures.

1363 **Supplementary Dataset 4**

1364 Differential expression analyses between iNSC 3D cultures and pNSC 3D  
1365 cultures.

1366

1367 **Supplementary Dataset 5**

1368 Elim Fischer cellular component analyses of differentially expressed genes  
1369 between iNSC 3D cultures and pNSC 3D cultures.

1370

1371 **Supplementary Dataset 6**

1372 KEGG pathway analysis of differentially expressed genes between iNSC 3D  
1373 cultures and pNSC 3D cultures.

1374

1375 **Supplementary Dataset 7**

1376 Differential expression analyses upon A $\beta$ 42 in 3D iNSC cultures.

1377

1378 **Supplementary Dataset 8**

1379 Differential expression analyses upon A $\beta$ 42 in 3D pNSC cultures.

1380

1381 **Supplementary Dataset 9**

1382 Elim Fischer cellular component analyses of differentially expressed genes  
1383 in A $\beta$ 42-treated 3D iNSC cultures.

1384

1385 **Supplementary Dataset 10**

1386 KEGG pathway analysis of differentially expressed genes in A $\beta$ 42-treated  
1387 3D iNSC cultures.

1388

1389 **Supplementary Dataset 11**

1390 Elim Fischer cellular component analyses of differentially expressed genes  
1391 in A $\beta$ 42-treated 3D pNSC cultures.

1392

1393 **Supplementary Dataset 12**

1394 KEGG pathway analysis of differentially expressed genes in A $\beta$ 42-treated  
1395 3D pNSC cultures.
